## RESEARCH ARTICLE

# *Camellia sinensis* methanolic leaves extract: Phytochemical analysis and anticancer activity against human liver cancer cells

Demiana H. Hanna<sup>1\*</sup>, Ahlam K. Al-Atmani<sup>1</sup>, Aljazi Abdullah AlRashidi<sup>2</sup>, E. El. Shafee<sup>1</sup>

**1** Faculty of Science, Department of Chemistry, Cairo University, Giza, Egypt, **2** Faculty of Science, Department of Chemistry, University of Hail, Hail, Saudi Arabia

\* [dhelmy@sci.cu.edu.eg](mailto:dhelmy@sci.cu.edu.eg)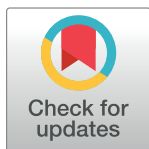

## Abstract

### Background

The study's primary goal is to ascertain whether there is a relationship between the processed green tea methanolic extract's (GTME) phytochemical components and its potential effectiveness against human liver cancer cells. The GTME's phytochemical composition was identified using gas chromatography-mass spectrometry, and the extract's capacity to lower cellular proliferation and cause apoptosis in HepG2 cancerous liver cell lines was checked.

### Results

The findings of the gas chromatography-mass chromatogram showed that GTME included bioactive antioxidants and anticancer substances. Additionally, utilizing the MTT, comet assay, and acridine assay, GTME revealed a selective cytotoxic impact with a significant IC<sub>50</sub> value (27.3 µg/ml) on HepG2 cells without any harmful effects on WI-38 healthy cells. Also, compared to untreated cells, the extract-treated HepG2 cells had an upsurge in the proportion of cells that have undergone apoptosis and displayed a comet nucleus, which is a sign of DNA damage. In addition, HepG2 cells treated with GTME revealed a stop in the G1 phase and sub-G1 apoptotic cells (37.32%) in a flow cytometry analysis. Furthermore, reactive oxygen species were shown to be responsible for HepG2 apoptosis, and the tested extract significantly reduced their levels in the treated cells. Lastly, compared to untreated cells in treated HepG2 cells, GTME significantly changed protein expression levels linked with cell cycle arrest in the G1 phase and apoptosis.

### Conclusion

These findings provided information about the processes through which the GTME inhibited the growth of HepG2. Therefore, it has potential as an effective natural therapy for the treatment of human liver cancer. However, to validate these findings, animal models must be used for *in vivo* studies.

## OPEN ACCESS

**Citation:** Hanna DH, Al-Atmani AK, AlRashidi AA, Shafee EE. (2024) *Camellia sinensis* methanolic leaves extract: Phytochemical analysis and anticancer activity against human liver cancer cells. PLoS ONE 19(11): e0309795. <https://doi.org/10.1371/journal.pone.0309795>

**Editor:** Adekunle Akeem Bakare, University of Ibadan Faculty of Science, NIGERIA

**Received:** March 26, 2024

**Accepted:** August 19, 2024

**Published:** November 14, 2024

**Copyright:** © 2024 Hanna et al. This is an open access article distributed under the terms of the [Creative Commons Attribution License](https://creativecommons.org/licenses/by/4.0/), which permits unrestricted use, distribution, and reproduction in any medium, provided the original author and source are credited.

**Data Availability Statement:** All relevant data are within the manuscript.

**Funding:** The author(s) received no specific funding for this work.

**Competing interests:** The authors have declared that no competing interests exist

**Abbreviations:** MTT 3, (4,5-Dimethylthiazol-2-yl)-2,5-diphenyltetrazolium bromide; IC<sub>50</sub>, Half maximal inhibitory concentration; ELISA, Enzyme-linked immunosorbent assay; Bax, Bcl-2

Associated X-protein; Bcl-2, B-cell lymphoma 2; CDK2, Cyclin dependent kinase 2; CDK4, Cyclin-Dependent Kinase 4.

## Background

Liver cancer ranks fourth globally in terms of cancer-related deaths, following stomach, lung, and colorectal cancer [1]. It is also the sixth—most commonly diagnosed malignancy. With an incidence-to-mortality ratio that is close to one and the majority of cases being discovered at advanced stages, liver cancer is a very deadly tumor [2]. Hepatocellular carcinoma (HCC) is a major global health concern that accounts for approximately 75–85% of primary liver malignancies [3]. Reactive oxygen species (ROS)-induced hepatocellular damage and the development of chronic inflammation linked to hepatocarcinogenesis occur prior to the induction of HCC [4]. The HCC has been defeated by adjuvant treatments such as doxorubicin, interferon alpha, and 5-FU; or tumor necrosis factor and melphalan; or cisplatin, epirubicin, and 5-FU [5]. Nevertheless, the primary issue with chemotherapy for HCC treatment is the cancer resistance mechanism, which results from a decrease in apoptotic proteins and an up-regulation of the multi-drug resistance protein [6]. Consequently, in order to successfully treat cancer, apoptosis induction must be induced, and this requires more potent chemotherapy [7].

As a result of the chemotherapeutic issues, including hepatotoxicity, recurrence, drug resistance, and other undesirable effects, researchers are now forced to look at alternative therapy choices with fewer side effects and higher therapeutic efficacy. Moreover, the anticarcinogenic medicines currently being studied in human cancer research trials have significant drawbacks, including their high cost, the inevitable long-term subcutaneous or intravenous treatment, and frequently their propensity to kill some healthy cells along with cancer cells. So, much research has been conducted to find potential natural cancer treatments that could be beneficial in the treatment and prevention of malignancies.

Natural remedies derived from plants can be used to cure a variety of illnesses without the harmful side effects linked to synthetic medicines [8,9]. In the past few decades, natural compounds have been considered to be important sources of potential chemotherapeutic medicines. There has been a lot of interest in the potential of bioactive substances found in natural products for preventing cancer. Plants have long been used to cure various cancer cells [10]. Numerous naturally occurring substances and plant extracts have shown antioxidant and anti-cancer potential in a range of bioassay systems and animal models relevant to human diseases, according to experimental research [11]. Phenolic chemical constituents have been linked to the antioxidant and anti-cancer properties of extracts derived from medicinal plants and herbs. Flavonoids, tannins, quinones, coumarins, lignans, phenolic acids, stilbenes, and curcuminoids were the main categories of phenolic chemicals [12].

Green tea, one of the most important natural plants, is derived from the leaves of the natural species *Camellia sinensis*, and it is well recognized as one of the most widely consumed beverages on a global scale. About 15–20% of green tea's protein is composed of amino acids, including tyrosine, threonine, 5-N-ethylglutamine, glutamic acid, aspartic acid, and others. Additionally, it has traces of metals like magnesium and carbohydrates such as glucose, cellulose, and sucrose [13]. Consumers are also benefiting from its reported antioxidant, anti-inflammatory, and antibacterial qualities [14]. The most abundant and effective class of tea components are called polyphenols, and they comprise the cancer chemopreventive potentials of representative polyphenols in green tea (caffeic acid, CA; gallic acid, GA; catechin, C; epicatechin, EC; gallo catechin, GC; catechin gallate, CG; gallo catechin gallate, GCG; epicatechin gallate, ECG; epigallocatechin, EGC; and epigallocatechin gallate, EGCG) [15]. Cancer development, propagation, and progression are all inhibited by the chemopreventive and chemotherapeutic effects of green tea polyphenols [16]. Antioxidant action, protection against DNA damage, suppression of proteasome activity, activation of apoptosis, modulation of the cell

cycle and proliferation, and avoidance of tumor-promoting events are just some of the biological effects attributed to green tea polyphenols [17,18].

Previous research has demonstrated the effectiveness of methanol green tea extract in suppressing various cancer cells, such as human cervical cancer cells [19] and renal carcinoma cells [20]. Nevertheless, research on the harmful effects of methanol green tea extract on human liver cancer cells has not yet been conducted. Therefore, the purpose of this work is to quantify the potential effect of the methanolic green leaf extract on inhibiting the growth and dissemination of HepG2 liver malignant cells and elucidating the various routes involved in the potential activation of apoptosis.

## Methods

### Standards and reagents

Methanol (CAT. No. 322415), DMSO (CAT. No. 5.89569), MTT (CAT. No. M5655), and Minimum Essential Medium (CAT. No. M0268), PBS (CAT. No. P4417), formaldehyde (CAT. No. 252549), Gallic acid (CAT. No. G7384), Quercetin (CAT. No. Q4951), Tannic Acid (CAT. No. 403040), Folin Phenol reagent (CAT. No. F9252), and sodium carbonate solution (CAT. No. 223530) were purchased from Sigma-Aldrich, Saint Louis, USA.

### Plant collection, identification and processing

The leaves and buds of *Camellia sinensis*, a member of the Theaceae family, were harvested at El-Orman Garden in Giza, Egypt, amid the flowering stage. The taxonomist Mrs. Tressa Labib of El-Orman Garden in Giza, Egypt, graciously identified the plant samples. Voucher specimens (voucher No. CS-322) were placed in the National Research Center's herbarium in Cairo. The leaves were obtained, repeatedly cleaned with distilled water, evaporated under free airing at temperatures between 35 and 43°C, crushed in a mortar, and then stored at 20°C until needed.

### Preparation of hydromethanolic extract of green tea leaves

Green tea hydromethanolic extract (GTME) from *Camellia sinensis* leaves was prepared as previously stated [21]. An extract-containing solvent was submerged in a solution of 400 g of finely ground green tea leaves for 72 h while being constantly stirred in an equation of 80 methanol to 20 distilled water. After that, the combination was filtered to remove the solvent from the chopped leaves. A rotary evaporator was subsequently utilized to concentrate the end-product solvent three times. After being lyophilized in a freeze-dryer and hardening for 48 h, the extract eventually took the form of a dried green tea hydromethanolic extract (GTME), which was retained at 4°C before usage.

### Quantitative screening of phytochemicals

Using conventional techniques, the initial screening tests for phytochemicals were conducted to determine the valuable components:

### Evaluation of the total phenol content

The total amount of phenols in the green leaf extract was determined using the Folin–Ciocalteu technique and gallic acid (GAE), a standard phenolic component [21]. A concentration of one milligram per milliliter was used to prepare the GAE stock solution, and one milligram per milliliter was used to prepare the GTME. Additionally, the standard curve was built using six working concentrations of GAE, which ranged from 15.625 to 500 µg/ml. Using methanol

as a blank, the optical density of the samples was measured at 765 nm. The total quantity of phenol in the GTME sample was then computed using the GAE calibration curve by applying the following Formula (1):

$$\text{TPC} = C \times V/M \quad (1)$$

where C is the concentration of GAE in mg/ml that was calculated using the calibration curve, V is the amount of the GTME solution in ml, and M is the mass of the extract in g. TPC is the total phenolic content, which is expressed as mg GAE/g of the GTME. The results were shown as the average of three different trials, with each measurement being performed in triplicate.

### Estimation of the total flavonoid content

A colorimetric aluminum chloride test was employed to determine the total quantity of flavonoids in the produced GTME by measuring quercetin (QE), a standard flavonoid component [22]. Both the GTME and the QE stock solution were made with a concentration of one milligram per milliliter in methanol. Moreover, the standard curve was created using six working concentrations of QE, which ranged from 15.625 to 500 µg/ml. Using methanol as a blank, the optical density of the samples was measured at 415 nm. The total flavonoid content of the GTME sample was computed by utilizing the QE calibration curve and the following Formula (2):

$$C = (c \times V)/m \quad (2)$$

where c is the quantity of QE obtained using the calibration curve (measured in mg/ml), V is the extract's volume (measured in ml), m is the weight of the tested extract (measured in g), and C is the total amount of flavonoid components represented as mg of QE/g of the GTME. The data were presented as the average of three independent trials, and each measurement was completed in triplicate.

### Estimation of the total tannin content

The Folin and Ciocalteu method [23] was used to measure the GTME's tannin content. Within distinct test tubes, the GTME (0.1 mL) and the standard Tannic Acid (TAE) solution at six distinct concentrations (from 15.625 to 500 µg/ml) were added. Finally, the volume was increased up to 10 mL with distilled water after adding 7.5 mL of distilled water, 0.5 mL of Folin Phenol reagent, and 1 mL of sodium carbonate solution (35%). Following a thorough shaking of the combination and a 30-minute room temperature hold, the absorbance of the mixture was measured at 725 nm using a Shimadzu UV PC-1600 UV-Vis spectrophotometer against a blank. In milligrams of tannic acid equivalents per gram of extract, the GTME's total tannin concentration was reported.

### Determining the extract's phytochemical constituents using gas chromatography-mass spectrometry (GC-MS) analysis

Through the process of derivatization via silylation, the compounds in the extract were identified using GC-MS analysis. The GC analysis of non-volatile and thermolabile substances is best performed via silylation. Trimethylsilyl TMS derivatives have more volatile, less polar, and thermotolerant properties in contrast to their parent compounds. Silylation is the process by which a trimethylsilyl group replaces an active hydrogen in -OH, -COOH, =NH, -NH<sub>2</sub>, or -SH [24]. Deploying a mass selective detector (5977A) and a 7890B GC apparatus from Agilent Technologies, the GTME's chromatographic analysis was successfully completed. The

sample was silylated for 2 h at 80°C with N, O-bis (trimethylsilyl) trifluoroacetamide (BSTFA) ahead of insertion onto GC-MS. The column was kept at 60°C for 5 min after the specimen was added, and then it was heated to 300°C using a 20°C/min heating ramp with a hold of 5 min. between 50 and 550 atomic mass units (AMUs), with a solvent delay of 3.0 min and electron impact (EI) ionization at a power level of 70 eV. 8.2 psi of pressure as well as a 1 µl injection of helium were utilized as the carrier gas in a capillary column (HP5MS capillary; 30.0 m, 0.25 mm ID, 0.25 m film). The sample contents were then identified with mass fragmentation and the NIST mass spectral search tool for the NIST/EPA/NIH mass spectral library version 2.2.

## Anticancer properties

**Preparation and maintenance of cell lines.** The American Type Culture Collection acquired cellular HepG2, a human hepatic cancer cell line, and WI-38, a healthy embryonic lung cell line. Minimum Essential Medium (MEM) was used to cultivate these cells, which were enriched with fetal bovine serum and a mixture of two antibiotics, streptomycin (100 mg/ml) and penicillin (100 U/ml), and housed at 37°C in a CO<sub>2</sub>-filled incubator. Trypsinization created monolayer cells, which were then maintained and used in the following experiments by subculturing in culture flasks.

**MTT-based cytotoxicity assay.** To evaluate the effectiveness of the GTME against the HepG2 malignant cells, the MTT assay, which has been discussed previously [25,26], was used. In short, 1×10<sup>4</sup> HepG2 cells were seeded in each 96-well plate with the growth MEM medium, and the plates were then incubated at 37°C for the overnight period. Next, HepG2 cells were treated for 24 h at 37°C with a range of extract dosages (6.25–100 µg/ml). These dosages were first dissolved in DMSO and then diluted with cell culture medium to reach the required final test concentration, while the vehicle control (DMSO) concentration was maintained at or below 0.1%. Next, for four hours at 37°C, 20 µl of MTT solution (5 mg/ml in PBS) was added to the treated and untreated (control) cells. Insoluble formazan crystals, which are a metabolic byproduct of MTT, were ultimately formed and are strongly correlated with cell viability. On top of that, dimethyl sulfoxide was applied to remove the formazan crystals from the cells. With the goal of expressing the outcome of the green tea extract on cell proliferation, the optical density at 570 nm was measured using a microplate reader (Bio-Rad, USA), and the proportion of HepG2 cell viability was evaluated using the formulae shown in (3).

$$\text{Cell viability} = (\text{Abs.of tested sample} - \text{Abs.of blank}) / (\text{Abs.of control} - \text{Abs.of blank}) \times 100(3)$$

The necessary dose of the examined extract was estimated by a dosage agreement curve (IC<sub>50</sub>) for 50% viability suppression over a 24-h incubation period. To find out whether using the green tea extract on tissues that were alive was secure, all steps of the MTT technique at concentrations between 31 and 500 µg/ml of the extract were performed against healthy embryonic lung cells (WI-38).

**Annexin V/PI analysis for apoptosis testing.** The phosphatidylserine (PS) transit from the center of the plasma membrane to the outer surface of apoptotic cells provides the basis for the annexin V/PI assay. Hence, implementing the aforementioned Annexin V-FITC detection kit I (BD Biosciences), the percentages of cells that underwent necrosis and apoptosis on either of GTME-treated and untreated HepG2 cells for 24 h were determined, as described earlier [25,27,28]. In a nutshell, the extract was only administered to the HepG2 cells for 24 h. After being trypsinized, centrifuged, and rinsed with PBS, the extract-treated and untreated HepG2 cells were incorporated into the Annexin V binding buffer (1x) and then subjected to the dyes Annexin V-FITC and propidium iodide. Using a flow cytometer (BD Biosciences), the results

are finally presented as the proportion of each preliminary and advanced apoptotic cell that underwent apoptosis.

**Fluorescence microscopy-based morphological study.** Applying the acridine orange/ethidium bromide stain (AO/EB) method, the control and extract-treated SKOV3 cells' morphological apoptotic nuclear transformations were examined [29,30]. In brief, after being subjected to the GTME, HepG2 cells were rinsed with PBS, fixed in formaldehyde for about 20 min, and stained for two min with AO/EB stain. Ultimately, employing fluorescence microscopy (Carl Zeiss), the nuclear patterns of the control and treated HepG2 cells were investigated, and the rates of cell death were issued. The outcomes represented a consensus of the three assessments after each value was evaluated three times. Ultimately, employing fluorescence microscopy (Carl Zeiss), investigating the nuclear morphology of the untreated and treated HepG2 cells, as well as the cell death rates, was done. The results were the average of the three evaluations after each value was evaluated three times.

**In vitro comet assay.** The genotoxicity that was induced in HepG2 cells treated with green tea extract was investigated using the comet assay. Under a fluorescence microscope, strands of damaged DNA will separate from healthy cellular DNA during disintegration. This will end up in a structure that resembles a comet tail. The process involves a number of steps, many of which have already been covered [28,29]. For example, 100 images of comets with random shapes were taken using a computerized image analysis system for each slide. TriTek Comet Score™ software (TriTek Corp., VA, USA) then analyzed these images to determine the comet parameters. The tail DNA and the tail moment, two commonly utilized signs, were built to be used in discovering the data. It is believed that the Olive tail moment (OTM), also known as a tail moment parameter, represents the most exact estimate that has been used to assess DNA damage. The following Eq (4) was applied to determine its value., and it depends on DNA mobility and quantity in the tail.

$$\text{OTM} = \text{quantity of tail moment} \times \text{quantity of tail DNA divided by 100} \quad (4)$$

All of these comet assay phases were carried out with healthy WI-38 cells in addition to HepG2 cells to evaluate the extract's genotoxicity with regard to healthy tissues.

**Examining the variant phases of the cell cycle.** Using a cell cycle assay, which analyzes the DNA present in the examined cells, cell division phases were determined. Using the previously described flow cytometry kit (Abcam, catalog ab139418) [25,28], through all phases of the cell cycle, the proportions of untreated and extract-treated cells were measured. HepG2 cells were put into a 6-well culture plate, incubated for an overnight period, and then cultured for 24 h. The extract was then administered to these cells for 24 h, then the cells were gathered, trypsinized, and stored in cold ethanol for an overnight period. The propidium iodide mixture was then applied to these cells for 30 min in the dark and at 37°C. The final phase involved using DNA measurement and flow cytometry to calculate the proportion of cells in every stage of the cell cycle. A histogram representing the results was displayed.

**ELISA method for quantifying reactive oxygen species (ROS).** According to the manufacturer's instructions, a human ROS ELISA kit (MyBioSource, USA) was employed to calculate the examined green tea extract's impact on the formation of ROS in HepG2-treated cells [25,31]. In brief, trypsinization, centrifugation, and addition of the supernatant to the relevant wells in a 96-well microplate reader that was covered with an anti-ROS antibody were used to separate the control and green tea extract-treated HepG2 cells. The examined plate was then treated with 100 µl of a working solution containing biotinylated recognition Ab (1x). The conjugate avidin horseradish peroxidase (1x) was poured into the clean wells and left to sit for 30 min at 37°C. Additionally, after being rinsed five times, 90µl of the substrate were placed

into the plate's wells and left in the dark for fifteen minutes. The enzyme-substrate reaction required that the tested plate be thoroughly cleaned and dried before applying about 90  $\mu$ l of the substrate to each well for fifteen minutes at 37°C for the purpose of producing a blue-colored complex. At last, 50  $\mu$ l of stop solution were added to each well, creating the yellow solution. Yellow's absorbance at 450 nm has been evaluated with a microplate reader. The ROS level in the extract-treated cells was calculated using the standard curve, which shows standard doses vs. the intensity of the color. All values were evaluated three times, and the results show the average of the three assessments.

**Quantitative Real-Time PCR Technique (qRT-PCR).** The following genes' mRNA expression levels were evaluated to look into potential processes associated with the result of the green tea extract on cell cycle arrest and apoptosis inside the treated HepG2 cancer cells: genes involved in the cell cycle (*P21*, *P27*, *CDK2*, *CDK4*, *Cyclin E*, and *Cyclin D1*) and genes that regulate apoptosis (*Bax*, *Caspase-3*, and *Bcl-2*). In brief, total RNA was isolated using Thermo Fisher Scientific's RNA purification kit (catalog #K0731) according to the instructions provided by the manufacturer from both untreated and green tea-treated HepG2 cells. Then, with the intent to gauge the ratio of A260/A280, the quantities of the extracted RNA for every tested sample were acquired. Following the manufacturer's instructions, first-strand cDNA was generated from the received RNA samples using a kit from Thermo Fisher Scientific termed RevertAid (catalog #K1621). Realtime PCR amplification was carried out using the Thermo Fisher Scientific Maxima SYBR Green qPCR kit (catalog #K0221) and particular primers (Invitrogen) for the investigated genes, as illustrated in [Table 1](#). The relative quantification (RQ) of the applied genes was computed using a comparative threshold cycle approach in comparison to their varying expression in the untreated samples and normalized to a house-keeping gene dubbed B-actin. The outcomes of three separate investigations were averaged, and each one was carried out in triplicate.

## ELISA testing

The targeted genes' levels of protein expression were assessed using an ELISA method in HepG2 cells that were recently challenged with green tea extract. In the ELISA process, human Bax ELISA Kit (ab199080), human Bcl-2 Kit (ab272102), human cleaved Caspase-3 Kit (ab220655), human P21 ELISA Kit (ab214658), human Cyclin E1 Kit (ab231929), and human Cyclin D1 ELISA Kit (ab214571) were employed. All of these kits were produced using a single, highly sensitive sandwich enzyme assay that takes 90 minutes to complete. This assay uses antibodies that act as trapping agents linked to the affinity tag and is additionally detected by an exact anti-tag antibody that has been precoated on the testing ELISA plate. The examined

**Table 1.** The primer sequences of the examined genes along with their GenBank accession numbers.

| Gene             | Forward primer            | Reverse primer           | Accession No.  |
|------------------|---------------------------|--------------------------|----------------|
| <i>CyclinE</i>   | CAGAGACAGCTTGGATTTC       | ACTGTCTTTGGTGGAGAA GG    | NM_001237.5    |
| <i>CDK2</i>      | GCTAGCAGACTTTGGACTAGCCAG  | AGCTCGGTACCACAGGGTCA     | NM_052827.4    |
| <i>P21</i>       | CGATGGAACCTCGACTTTGTCA    | GCACAAGGGTACAAGACAGTG    | NM_001374511.1 |
| <i>Cyclin D1</i> | TCCAGAGT GATCAAGTGTGA     | GATGTCCACGTCCCGCACGT     | NM_004994.3    |
| <i>P27</i>       | GCCCTCCCCAGTCTCTCTTA      | TCAAAACCTCCAAGCACCTC     | NM_001302510.2 |
| <i>BCL-2</i>     | CCTGTG GAT GAC TGA GTACC  | GAGACA GCC AGG AGAAAT CA | NM_000633.3    |
| <i>BAX</i>       | GTTTCA TCC AGG ATC GAGCAG | CATCTT CTT CCA GATGGT GA | NM_001291428.2 |
| <i>Caspase-3</i> | CAGAACTGGACTGTGGCATTGAG   | GGATGAACCAGGAGCCATCCT    | NM_004346.4    |
| <i>CDK4</i>      | CTGGTGTTTGAGCATGTAGACC    | AAACTGGCGCATCAGATCCTT    | NM_001357943.2 |

<https://doi.org/10.1371/journal.pone.0309795.t001>

extract-containing established HepG2 cells were spun up, and the pellet was then transferred to a 96-well ELISA panel alongside a corresponding quantity of an antibody cocktail solution. The plate was then put away at room temperature for 1 h to permit the antibodies to stick to the sample. After thoroughly rinsing the plate in wash buffer (1x), a tetramethylbenzidine substrate solution was added to each well for ten min. Upon that, the plate was placed in a dim area. Then, immediately following the addition of a stop solution, the intensity at 450 nm was recorded via an automatic microplate reader.

Similar to the aforementioned, the CDK2 ELISA kit (catalog no. MBS2020144), CDK4 Human ELISA Kit (catalog no. E-EL-H2323, MyBioSource, USA), and P27 Human ELISA Kit (catalog no. E-EL-H0909, MyBioSource, USA) were employed to gauge the amounts of protein expression levels of CDK2, CDK4, and P27, respectively: The 96-well plates contained in these kits, which used sandwich ELISA double-antibody approaches, had already been coated with anti-human CDK2, anti-human CDK4, and anti-human P27 antibodies. The wells were cleaned with washing buffer before adding the test and standard samples (HepG2 cell extract-treated supernatant) and identifying the antibody containing biotin-conjugated antibodies. After that, streptavidin and horseradish peroxidase were applied to the wells, followed by the application of the HRP substrate, which caused the production of a blue hue. The reaction was then halted by adding an acidic solution, which caused the blue color to change to yellow.

### Statistical analysis

All studies were completed three times, and the outcomes are shown as the mean  $\pm$  standard deviation. All statistical analyses were carried out employing independent T- test using the SPSS 17.0 software. Statistical significance was assigned to values of  $p \leq 0.05$ ,  $p \leq 0.01$ , and  $p \leq 0.001$ .

## Results and discussion

### Discovering phytochemical components using GC-MS

A total of 71 compounds were identified by GC-MS analysis; most of them have higher biological activity that may be responsible for the biological effectiveness of the examined green tea extract, with various retention durations indicated in Fig 1. The biological activity of these

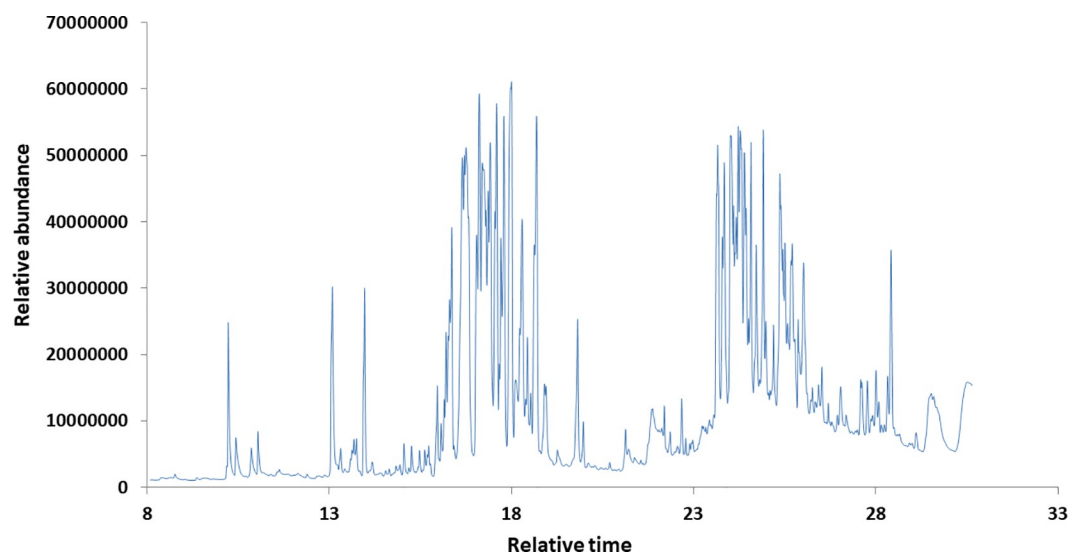

**Fig 1.** GC-MS chromatogram of the green tea leaf methanol extract (GTME) for the assessment of phytochemicals. Table 2 lists all the phytochemical TMS derivatives that have been seen in this image.

<https://doi.org/10.1371/journal.pone.0309795.g001>



compounds, along with their percentages of the peak area and retention time, is shown in [Table 2](#). Thus, the current findings about the anticancer efficacy of the investigated extract of green tea (*Camellia sinensis*) may be attributed to the presence of these components. Most phenolic ingredients, including polyphenols in green tea, have the ability to promote cancer defense in a range of biological operations. Green tea polyphenols are renowned for their powerful antioxidant activities and could be significant in anticancer behavior, protecting pre-malignant cells from DNA damage induced by oxidation [32]. Growth arrest and apoptosis can be triggered by other processes besides the antioxidant properties of these phenolic chemicals, which may not be sufficient for their chemopreventive benefits [33].

### Estimation of total phenolic, flavonoids and tannins

Phenolic and flavonoid components in medicinal herbs are the main sources of antioxidants. Numerous plant secondary metabolites have been shown to possess pharmacological properties including antioxidant, antifungal, anticancer, and antibacterial properties, as well as to be physiologically active compounds [99]. They may also aid in the prevention of chronic diseases. GTME's flavonoids and polyphenols can protect cells from oxidative stress, which reduces the likelihood that oxidative stress will lead to the development of cancer [100]. The current acquired results demonstrated that the total phenolic, flavonoid, and tannin content in the examined GTME was  $128.8 \pm 3.12$  mg of GAE,  $83.74 \pm 2.61$  mg of QE, and  $11.66 \pm 1.23$  mg of TAE per g of the GTME, respectively, based on the standard calibration plots for GAE, QE, and TAE. Phenolic compounds have the ability to scavenge singlet oxygen, free radicals, and superoxide radicals because of their redox properties [101]. Because hydroxyl groups replace the aromatic ring in polyphenolic compounds, they have the ability to scavenge radicals [102]. The antioxidant qualities of flavonoids, which are plant secondary metabolites, including flavones, flavanols, and tannins, depend on the presence of free OH groups, especially 3-OH. Furthermore, other studies have shown that flavonoids from plants function as antioxidants *in vivo* as well as *in vitro* [103,104]. Furthermore, earlier studies demonstrated that green leaf methanol extract included notable concentrations of phenols, tannins, and flavonoids [105].

### Efficiency of GTME on proliferation of HepG2 cells

**MTT cytotoxicity assay.** It was mentioned that the use of natural phytochemicals in cancer chemoprevention is an increasingly popular approach to preventing, slowing down, halting, and treating malignant tumors [25]. Thus, MTT investigations were performed to figure out the adverse impacts of the investigated GTME on the proliferation of HepG2 cells. By incorporating the MTT test, the findings demonstrated that the proportion of viable HepG2 cells drastically decreased in a concentration-related manner after being exposed to the analyzed extract for 24 h ([Fig 2A](#)). This discovery might highlight the extract's potential anticancer properties, which can be determined by its lower  $IC_{50}$  dose (27.3  $\mu\text{g/ml}$ ). This was calculated based on the link within the extract dose and how it affected cell life expectancy. Likewise, it has been verified that green tea plant extract suppresses the development of numerous cancer cell lines, occasionally due to its antioxidant qualities [106]. Also, methanol green tea extract has been shown to be effective in inhibiting the growth of human cervical cancer cells [19] and renal carcinoma cells [20]. Curcumin, an anticancer drug, was shown in earlier research to have an inhibitory effect on HepG2 cells after a 24-hour treatment period ( $IC_{50}$  value: 48.70  $\mu\text{g/ml}$ ) [107].

Results from culturing human lung normal cells, WI-38 cells, with GTME at concentrations ranging from 31.25 to 500  $\mu\text{g/ml}$  are presented in [Fig 2B](#), which reveal a significantly increased percentage of cell viability with an  $IC_{50}$  concentration equal to 2757.2  $\mu\text{g/ml}$ . These results

Table 2. Phytochemical components of *Camellia sinensis* methanolic extract as identified by GC-MS analysis.

| Peak No | Retention Time | Area%  | Name of the compound                                                                | Molecular formula | Molecular weight (g/mol) | Biological activity                                                      |
|---------|----------------|--------|-------------------------------------------------------------------------------------|-------------------|--------------------------|--------------------------------------------------------------------------|
| 1       | 10.2441        | 0.7119 | Acetic acid, 2-[2 [(trimethylsilyl)oxy]ethoxy]-, trimethylsilyl ester               | C11H28O4Si3       | 308.59                   | Antimicrobial Activity [34]                                              |
| 2       | 10.456         | 0.3113 | Silanol, trimethyl-, phosphate (3:1)                                                | C9H27O4PSi3       | 314.54                   | Antioxidant, Antibacterial activity [35]                                 |
| 3       | 10.874         | 0.2255 | Butanedioic acid, 2TMS derivative                                                   | C10H22O4Si2       | 262.45                   | Anti-inflammatory, Antimicrobial [36]                                    |
| 4       | 11.06          | 0.268  | Glyceric acid, 3TMS derivative                                                      | C12H30O4Si3       | 322.62                   | Antimicrobial Activity [37]                                              |
| 5       | 11.64          | 0.1019 | 2-Pentenoic acid, 2-[(trimethylsilyl)oxy]-, trimethylsilyl ester                    | C11H24O3Si2       | 260.47                   | Antibacterial activity [38]                                              |
| 6       | 13.088         | 1.293  | Malic Acid, 3TMS derivative                                                         | C13H30O5Si3       | 350.63                   | Antioxidant, Antibacterial activity [35], Anticarcinogenic activity [39] |
| 7       | 13.317         | 0.1646 | meso-Erythritol, 4TMS derivative                                                    | C16H42O4Si4       | 410.84                   | Sweet antioxidant [40]                                                   |
| 8       | 13.437         | 0.085  | Diglycolic acid, 2TMS derivative                                                    | C8H20O3Si2        | 220.41                   | Antioxidant activity[41]                                                 |
| 9       | 13.689         | 0.5664 | Pyrogallol, 3TMS derivative                                                         | C15H30O3Si3       | 342.65                   | Antioxidant, Antiseptic, Antibacterial, Anti-tumor Dye [42,43]           |
| 10      | 13.975         | 0.8736 | Hexanoic acid, 2-hydroxy-2-butyl-, 2 methylphenylhydrazide                          | C17H28N2O2        | 292.423                  | Antifungal activity [44]                                                 |
| 11      | 14.187         | 0.1373 | o-Coumaric acid, 2TBDMS derivative                                                  | C21H36O3Si2       | 392.7                    | Anticarcinogenic activity [45]                                           |
| 12      | 14.656         | 0.07   | Isoborneol, pentamethyldisilanyl ether                                              | C15H32OSi2        | 284.58                   | Antioxidant, Anti-viral Activity [46]                                    |
| 13      | 14.948         | 0.1515 | Erythritol, 4TMS derivative                                                         | C16H42O4Si4       | 410.84                   | Sweet antioxidant [47]                                                   |
| 14      | 15.062         | 0.1468 | 1,2-O-Isopropylidene-.alpha.-D-glucofuranose, 3TMS derivative                       | C9H16O6           | 220.22                   | Antifungal activity [48]                                                 |
| 15      | 15.274         | 0.194  | L-Rhamnose, 4TMS derivative                                                         | C18H44O5Si4       | 452.88                   | anti-inflammatory activity [49]                                          |
| 16      | 15.485         | 0.1443 | L-Threitol, 4TMS derivative                                                         | C16H42O4Si4       | 410.84                   | Antibacterial activity [50]                                              |
| 17      | 15.731         | 0.3378 | Xylitol, 5TMS derivative                                                            | C20H52O5Si5       | 513.05                   | Antimicrobial [51]                                                       |
| 18      | 15.972         | 0.4722 | D-Allose, oxime (isomer 1), 6TMS derivative                                         | C24H61NO6Si6      | 628.25                   | Antioxidative Activity [52]                                              |
| 19      | 16.081         | 0.2061 | Itaconic acid, 2TMS derivative                                                      | C11H22O4Si2       | 274.46                   | Anti-inflammation activity [53]                                          |
| 20      | 16.367         | 3.1304 | Fructofuranoside, methyl 1,3,4,6-tetrakis-O-(trimethylsilyl)-.alpha.-D-             | C19H46O6Si4       | 482.9                    | Anti-Oxidant activity [54]                                               |
| 21      | 16.767         | 7.2397 | 6-Hydroxyflavone-beta-D-glucoside, tetra (trimethylsilyl)-                          | C33H52O8Si4       | 689.1                    | Anticancer and antioxidant [55]                                          |
| 22      | 17.128         | 3.5932 | Pyrimidin-2-amine, 4-methyl-6-(2-pyridylthio)-                                      | C10H10            | 218.27                   | Antifungal Activity [56]                                                 |
| 23      | 17.231         | 3.7531 | Quinic acid (5TMS)                                                                  | C22H52O6Si5       | 553.1                    | Antibacterial activity [57]                                              |
| 24      | 17.425         | 3.2087 | 2-Butenoic acid, 2-[(tert-butyl)dimethylsilyl]oxy]-, tert-butyl)dimethylsilyl ester | C17H36O3Si2       | 344.64                   | antioxidant, anti-inflammatory activity [58]                             |
| 25      | 17.597         | 2.8917 | 2-Carboxycinnamic acid                                                              | C10H8O4           | 192.17                   | Antioxidant [59]                                                         |
| 26      | 17.803         | 3.1585 | Deoxyglucose, 4TMS derivative                                                       | C18H44O5Si4       | 452.88                   | Anticancer activity [60]                                                 |
| 27      | 17.992         | 3.7033 | D-Mannitol, 6TMS derivative                                                         | C24H62O6Si6       | 615.25                   | Anti-bacterial Activity [61]                                             |
| 28      | 18.129         | 0.8268 | Caffeine                                                                            | C8H10N4O2         | 194.19                   | Anticancer activity [62], antioxidant, anti-inflammatory [63]            |
| 29      | 18.301         | 2.2683 | Gallic acid, 4TMS derivative                                                        | C19H38O5Si4       | 458.84                   | Antioxidant [64], antimicrobial [65], antifungal [66], anticancer [67]   |
| 30      | 18.449         | 1.2158 | Arabinofuranose, 1,2,3,5-tetrakis-O-(trimethylsilyl)-                               | C17H42O5Si4       | 438.9                    | Antibacterial Activity [68]                                              |
| 31      | 18.695         | 3.0842 | Glycine, 2TBDMS derivative                                                          | C14H33NO2Si2      | 303.58                   | Antioxidant and Antimicrobial Activity [69]                              |
| 32      | 18.936         | 0.9875 | L-(+)-Tartaric acid, 4TMS derivative                                                | C16H38O6Si4       | 438.81                   | Antimicrobial, Antioxidant activity [70]                                 |
| 33      | 19.279         | 0.192  | Palmitic Acid, TMS derivative                                                       | C19H40O2Si        | 328.60                   | anticancer, anti-inflammatory activity [71]                              |

(Continued)

Table 2. (Continued)

| Peak No | Retention Time | Area%  | Name of the compound                                                          | Molecular formula                                              | Molecular weight (g/mol) | Biological activity                                                    |
|---------|----------------|--------|-------------------------------------------------------------------------------|----------------------------------------------------------------|--------------------------|------------------------------------------------------------------------|
| 34      | 19.823         | 0.8974 | Levoglucosan, 3TMS derivative                                                 | C15H34O5Si3                                                    | 378.68                   | Anticancer and antitumor activity [72]                                 |
| 35      | 19.983         | 0.1959 | Myo-Inositol, 6TMS derivative                                                 | C24H60O6Si6                                                    | 613.24                   | Anticancer activity [73]                                               |
| 36      | 21.144         | 0.4077 | D-(+)-Galactopyranose, 5TMS derivative                                        | C21H52O6Si5                                                    | 541.06                   | Antibacterial activity [74]                                            |
| 37      | 21.402         | 0.1416 | 6-Hydroxyfavone-beta-D-glucoside, tetra (trimethylsilyl)-                     | C <sub>33</sub> H <sub>52</sub> O <sub>8</sub> Si <sub>4</sub> | 689.1                    | Anticancer and antioxidant [75]                                        |
| 38      | 21.562         | 0.0808 | D-(+)-Galacturonic acid, 5TMS derivative                                      | C21H50O7Si5                                                    | 555.04                   | antioxidative and anticancer effects [76]                              |
| 39      | 21.877         | 1.6205 | Maltitol, nonakis(trimethylsilyl) ether                                       | C39H96O11Si9                                                   | 993.94                   | Antibacterial activity [77]                                            |
| 40      | 22.203         | 0.3366 | Oxalic acid, 2TMS derivative                                                  | C8H18O4Si2                                                     | 234.39                   | No reported activity                                                   |
| 41      | 22.363         | 0.256  | Molybdenum, tricarbonyl[(1,2,3,4,5,6-.eta.)-1,4-dimethylbenzene]-             | C11H10MoO3                                                     | 286.14                   | Anticancer and antidiabetic Activity [78]                              |
| 42      | 22.569         | 0.2573 | D-Ribose, 4TMS derivative                                                     | C5H10O5                                                        | 150.12                   | antiviral, anti-tubercular and anti-inflammatory activities [79]       |
| 43      | 22.684         | 0.496  | D-Glucuronic acid, 2,3,4,5-tetrakis-O-(trimethylsilyl)-, trimethylsilyl ester | C21H50O7Si5                                                    | 555.04                   | detoxification and protection of the liver [80]                        |
| 44      | 22.975         | 0.3299 | Glycerol, 3TMS derivative                                                     | C12H32O3Si3                                                    | 308.63                   | antimicrobial activities [81]                                          |
| 45      | 23.267         | 0.831  | Salicylic acid, 2TMS derivative                                               | C13H22O3Si2                                                    | 282.48                   | Antioxidant activity [82]                                              |
| 46      | 23.445         | 0.4667 | D-(+)-Xylose, tetrakis(trimethylsilyl) ether, methyloxime (syn)               | C18H45NO5Si4                                                   | 467.89                   | Antibacterial [83]                                                     |
| 47      | 23.668         | 3.0311 | Sucrose, 8TMS derivative                                                      | C36H86O11Si8                                                   | 919.74                   | Antibacterial [83]                                                     |
| 48      | 23.851         | 2.7647 | Lactulose, octakis(trimethylsilyl) ether, methyloxime (isomer 2)              | C37H89NO11Si8                                                  | 948.79                   | Prebiotic activity [84], anti tubulointerstitial fibrosis [85]         |
| 49      | 24.04          | 3.8229 | D-(-)-Ribofuranose, tetrakis(trimethylsilyl) ether                            | C17H42O5Si4                                                    | 438.85                   | antiviral, anti-tubercular and anti-inflammatory activities [79]       |
| 50      | 24.246         | 5.1177 | Xylonic acid, 2,3,4-tris-O-(trimethylsilyl)-, delta.-lactone, D-              | C14H32O5Si3                                                    | 364.65                   | antiviral and antimicrobial activity [86]                              |
| 51      | 24.412         | 2.956  | Thymol-.beta.-d-glucopyranoside, tetrakis(O-trimethylsilyl)-                  | C28H56O6Si4                                                    | 601.1                    | Antibacterial [87]                                                     |
| 52      | 24.583         | 1.59   | Methyl.beta.-Arabinofuranoside, 3TMS derivative                               | C15H36O5Si3                                                    | 380.2                    | Antioxidant Activity [88]                                              |
| 53      | 24.732         | 1.8818 | Uridine, 3TMS derivative                                                      | C18H36N2O6Si3                                                  | 460.74                   | Antimicrobial, anticancer activity [39]                                |
| 54      | 24.921         | 2.8263 | D-Arabinopyranose, 4TMS derivative (isomer 2)                                 | C17H42O5Si4                                                    | 438.85                   | Antioxidant Activity [88]                                              |
| 55      | 25.201         | 1.3047 | 2-O-Glycerol-.alpha.-d-galactopyranoside, hexa-TMS                            | C27H66O8Si6                                                    | 687.32                   | antimicrobial activities [81]                                          |
| 56      | 25.39          | 5.1465 | D-Xylopyranose, 4TMS derivative                                               | C17H42O5Si4                                                    | 438.85                   | Antibacterial and antimicrobial activity [86]                          |
| 57      | 25.705         | 2.5646 | alpha.-D-Glucopyranose, 5TMS derivative                                       | C21H52O6Si5                                                    | 541.06                   | antifungal activity antimalaria activity [89]                          |
| 58      | 25.894         | 0.895  | 2,5-Dihydroxybenzoic acid, 3TMS derivative                                    | C16H30O4Si3                                                    | 370.66                   | Antipyretic analgesic, antirheumatism, and antimicrobial activity [90] |
| 59      | 26.031         | 2.136  | 1H-Indole, 3-phenyl-2-(3'-phenyl-1H-indol-2'-yl)-                             | C28H20N2                                                       | 384.5                    | Antioxidant activity and anticancer activity [91]                      |
| 60      | 26.266         | 0.9705 | Caffeic acid, 3TMS derivative                                                 | C18H32O4Si3                                                    | 396.70                   | Antioxidant and anticarcinogenic [92]                                  |
| 61      | 26.529         | 1.3675 | Phenanthrene, 4-methyl-                                                       | C15H12                                                         | 192.25                   | Antitumor and antimicrobial [93]                                       |
| 62      | 26.706         | 0.7119 | alpha.-D-Lactose, 8TMS derivative                                             | C36H86O11Si8                                                   | 919.74                   | Antibacterial [83]                                                     |
| 63      | 27.05          | 0.9501 | Cycloheptasiloxane, tetradecamethyl-                                          | C14H42O7Si7                                                    | 519.07                   | antibacterial and antioxidant activity [94]                            |
| 64      | 27.204         | 0.6473 | Serine, 3TMS derivative                                                       | C12H31NO3Si3                                                   | 321.63                   | No reported activity                                                   |

(Continued)

Table 2. (Continued)

| Peak No | Retention Time | Area%  | Name of the compound                                                     | Molecular formula | Molecular weight (g/mol) | Biological activity                               |
|---------|----------------|--------|--------------------------------------------------------------------------|-------------------|--------------------------|---------------------------------------------------|
| 65      | 27.616         | 0.9969 | Maltose, octakis(trimethylsilyl) ether, methyloxime (isomer 2)           | C37H89NO11Si8     | 948.78                   | Antibacterial [95]                                |
| 66      | 27.782         | 0.4683 | 3-.alpha.-Mannobiose, octakis(trimethylsilyl) ether (isomer 1)           | C36H86O11Si8      | 919.745                  | No reported activity                              |
| 67      | 28.017         | 1.2909 | Arabinose, 4TMS derivative                                               | C17H42O5Si4       | 438.85                   | Antibacterial [96]                                |
| 68      | 28.429         | 2.177  | .beta.-L-Arabinopyranose, 4TMS derivative                                | C17H42O5Si4       | 438.85                   | Antioxidant Activity [88]                         |
| 69      | 29.121         | 0.1613 | 2-Pentenedioic acid, 2-[(trimethylsilyl)oxy]-, bis(trimethylsilyl) ester | C14H30O5Si3       | 362.64                   | Anti-inflammatory [97]                            |
| 70      | 29.527         | 1.9118 | Benzoic acid, 3-amino-5-hydroxy-tris(trimethylsilyl) derivative          | C16H31NO3Si3      | 369.68                   | No reported activity                              |
| 71      | 30.528         | 0.2771 | Protocatechoic acid, 3TMS derivative                                     | C16H30O4Si3       | 370.66                   | antioxidative and anti-inflammatory activity [98] |

<https://doi.org/10.1371/journal.pone.0309795.t002>

showed that the GTME was toxic to cancer cells while being non-toxic and biocompatible with healthy tissue. Previous research [108] has demonstrated that the IC<sub>50</sub> concentration of curcumin against non-cancerous WI-38 cells was 6.56 µg/ml, suggesting that the produced GTME is more safe than the anticancer medicine curcumin.

**Estimation of HepG2 cells' apoptosis generation.** The evaluated GTME's ability to induce apoptosis in HepG2 cells was assessed using a number of assays involving annexin V/PI, AO/EB, and comet. Beginning with Fig 3, displaying the flow cytometry-derived annexin V/PI for the extract-treated cells contrasted with untreated ones, it might be seen that, compared to the control cells, the extract-treated HepG2 cells possessed a larger proportion of early and late apoptotic cells. Previous research has shown that curcumin, an anticancer drug, dramatically boosted HepG2 cell death in a dose- and time-dependent manner [109].

In addition, a quantitative AO/EB protocol that is in particular made for nuclear labeling of apoptotic cells was applied to compute the percentages of apoptotic cells in HepG2 cells treated with green tea extract and to assess how apoptotic cells' altered nuclear morphology. As indicated by Fig 4, green, yellow-green, and orange hues were produced in the extract-treated HepG2 cells (Fig 4B), suggesting the existence of viable, early, and late apoptotic cells. While the green viable control cells (Fig 4A) did not show any discernible apoptosis, in contrast to

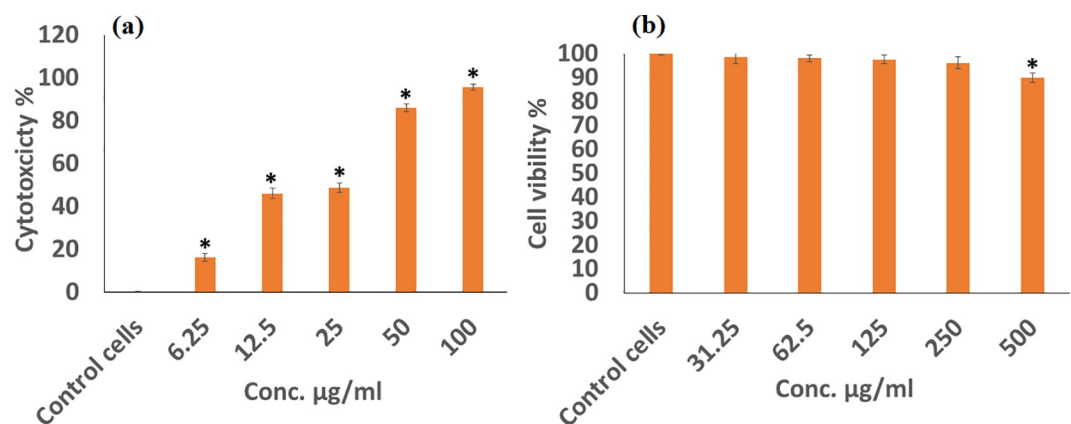

**Fig 2.** The cytotoxicity of HepG2 (a) and the viability of WI-38 cells (b) after 24 h of incubation against various doses of green tea methanol extract (GTME). The values are compared to the control (untreated cells), \*  $p < 0.05$ .

<https://doi.org/10.1371/journal.pone.0309795.g002>

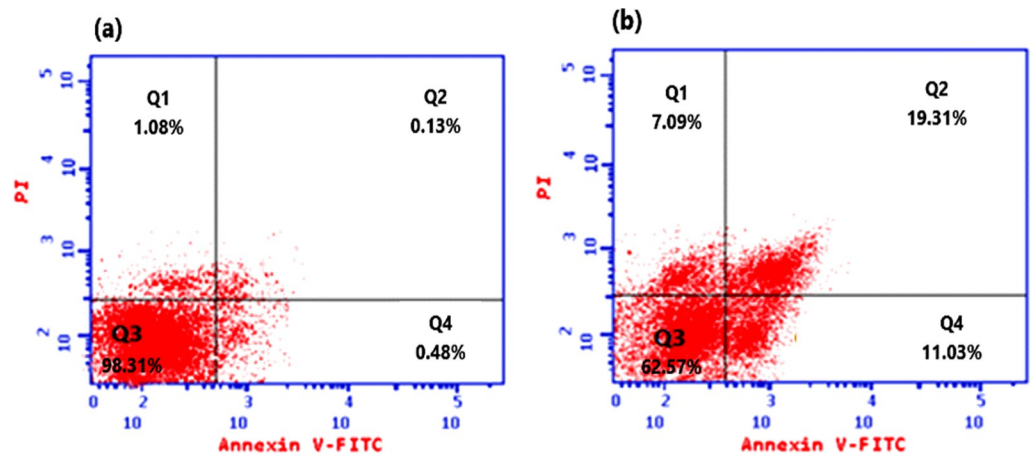

**Fig 3.** Using flow cytometry, the apoptotic pattern of HepG2 cells was assessed, displaying Q1 (An-, PI+) % of necrotic cells, Q2 (An+, PI+) % of late apoptotic cells, Q3 (An-, PI-) % of viable cells, and Q4 (An+, PI-) % of early apoptotic cells for treated GTME cells with an IC50 dose (27.3 $\mu$ g/ml) of GTME (b) in comparison to untreated HepG2 cells (a).

<https://doi.org/10.1371/journal.pone.0309795.g003>

control cells ( $9.5 \pm 0.58$ ), the percent of apoptotic cells was significantly greater in treated cells ( $90.5 \pm 2.65$ ). According to prior studies, Epigallocatechin-3-gallate has been shown to trigger apoptosis in a variety of human cancer cells, including those of the pancreas [110] and the colon [111], via modulating apoptosis related proteins. Additionally, prior studies employing the AO/EB test showed that curcumin induced morphological and staining alterations in treated HepG2 cells were suggestive of both early and late apoptosis [112]. The AO/EB test for the extract's consequence on healthy WI-38 cells revealed, as shown in Fig 4C and 4D, that the GTME-treated WI-38 cells had a shade of green that was comparable to the green color seen in untreated cells and lacked any obvious symptoms of apoptosis.

The comet strategy is also used to detect DNA damage brought on by treated cells starting to go into apoptosis. Moreover, fluorescent microscopy imagery (Fig 5) indicated that treated cells (Fig 5B) had a comet-like structure with an increment in the tail length, indicating that a disproportionate buildup of DNA in the tail perhaps caused the nuclear density to decline, in contradiction to the control cells (Fig 5A), which maintained their fundamental nuclear structure. Caspase3 (activated caspase-3), as stated earlier, is essential for the apoptosis-mediated cell death process, which causes DNA fragmentation and nuclear condensation [113]. According to Table 3, the OTM of the GTME-treated and untreated cells was significantly different. Previous investigations have indicated that large doses of the anticancer drug curcumin can cause damage to the nuclear DNA of HepG2 cells [114].

In an effort to confirm caspase-3's essential role in DNA fragmentation and the execution of apoptosis in treated HepG2 cells, the extract's impact on Caspase-3 expression was assessed. The outcomes demonstrated that the treated cells expressed more caspase-3 than the control cells. Previous studies have also shown that DNA fragmentation is a hallmark of apoptosis produced by green tea polyphenols in MCF-7 cells [115]. Additionally, the comet analysis results for the impact of the GTME on the DNA of normal WI-38 cells are consistent with the OTM values of the control cells and the cells treated with the tested extract, which were not significantly opposed to one another (Table 3). The comet fluorescence results in the extract-treated WI-38 cells, which showed an undamaged, intact nucleus, provided additional proof that the extract had no genotoxic effects on healthy, alive tissues. (Fig 5D) is the same as the healthy nucleus of control cells without any effect on DNA (Fig 5C).

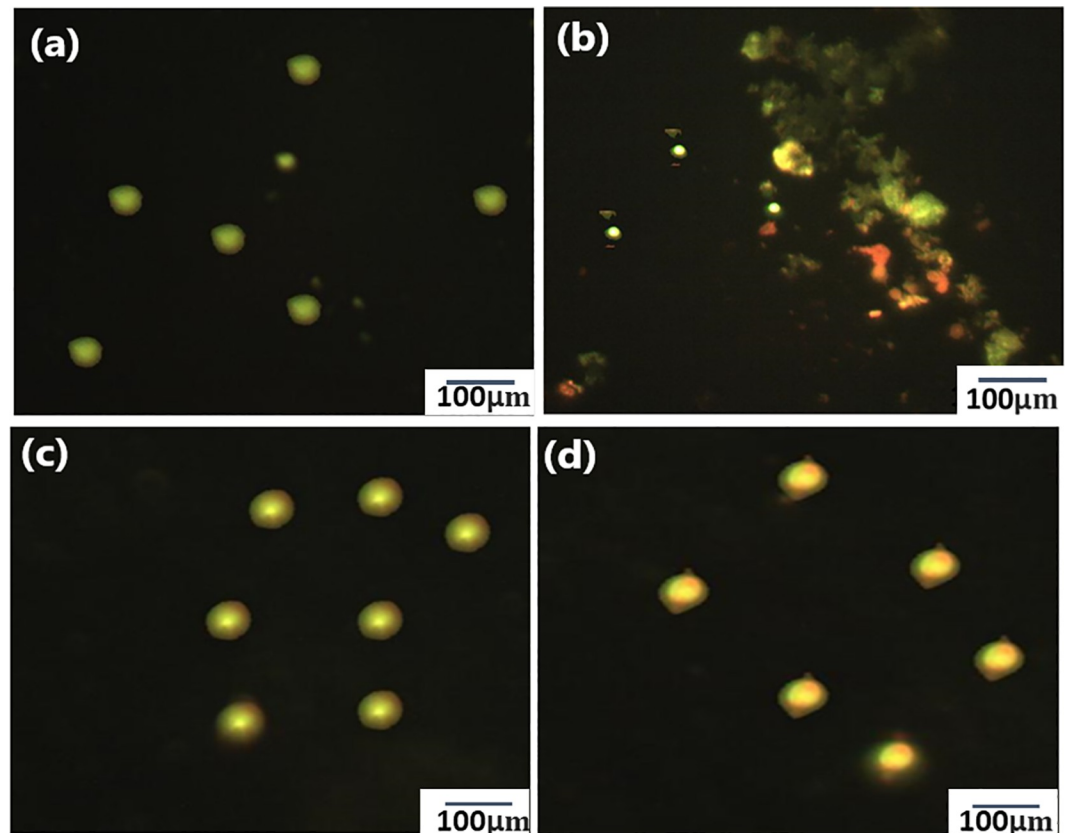

**Fig 4.** Using fluorescence microscopy and AO/EB labelling, the nuclear morphological alterations in treated HepG2 cells with an  $IC_{50}$  dose ( $27.3\mu\text{g/ml}$ ) of GTME (b) in comparison to untreated HepG2 cells (a) and also GTME treated normal WI-38 cells (d) in comparison to untreated WI-38 cells (c) have been observed. All images are at 40X magnification.

<https://doi.org/10.1371/journal.pone.0309795.g004>

**Cell cycle analysis.** One of the primary strategies for preventing the spread of cancer is to inhibit the cell cycle's progression [116]. Therefore, it was possible to examine the data using flow cytometry to determine how the investigated extract affected the regulation of the HepG2 cell cycle phases. Fig 6A–6C. The control cells did not exhibit any apoptosis-related symptoms, as shown in Fig 6A, while in treated HepG2 cells, the green tea extract resulted in a significantly larger percentage of apoptotic cells in the sub-G1 phase with a pausing in the G1 phase (Fig 6B), demonstrating that it causes apoptosis. The ratios of the cell population throughout each stage of the HepG2 cell cycle are shown in a typical histogram that compares control cells with cells treated with the extract. (Fig 6C). Likewise, previous studies demonstrated that the appositive anticancer medication curcumin caused G1 phase stopping in HepG2 treated cells [117].

Green tea polyphenols have been demonstrated to elicit cell cycle arrest in MCF-7 breast cancer cells at the G1/S and G2/M transitions [115]. Also, earlier studies have revealed that the polyphenolic substance found in green tea, called epigallocatechin-3-gallate, can induce cell cycle halt at the G1 phase in several human cancer cells, including pancreatic [110], head and neck squamous carcinoma [118], and colon [119], via modulating proteins that control the G1 phase of the cell cycle. Numerous signaling molecules and checkpoints (CDKs) that control cell division mediate cell proliferation. On the one hand, the combination of cyclins (D and E) and cyclin-dependent kinases (CDK4, CDK6, and CDK2) positively controls cell cycle progression, which releases the E2F transcription factors and phosphorylates the retinoblastoma

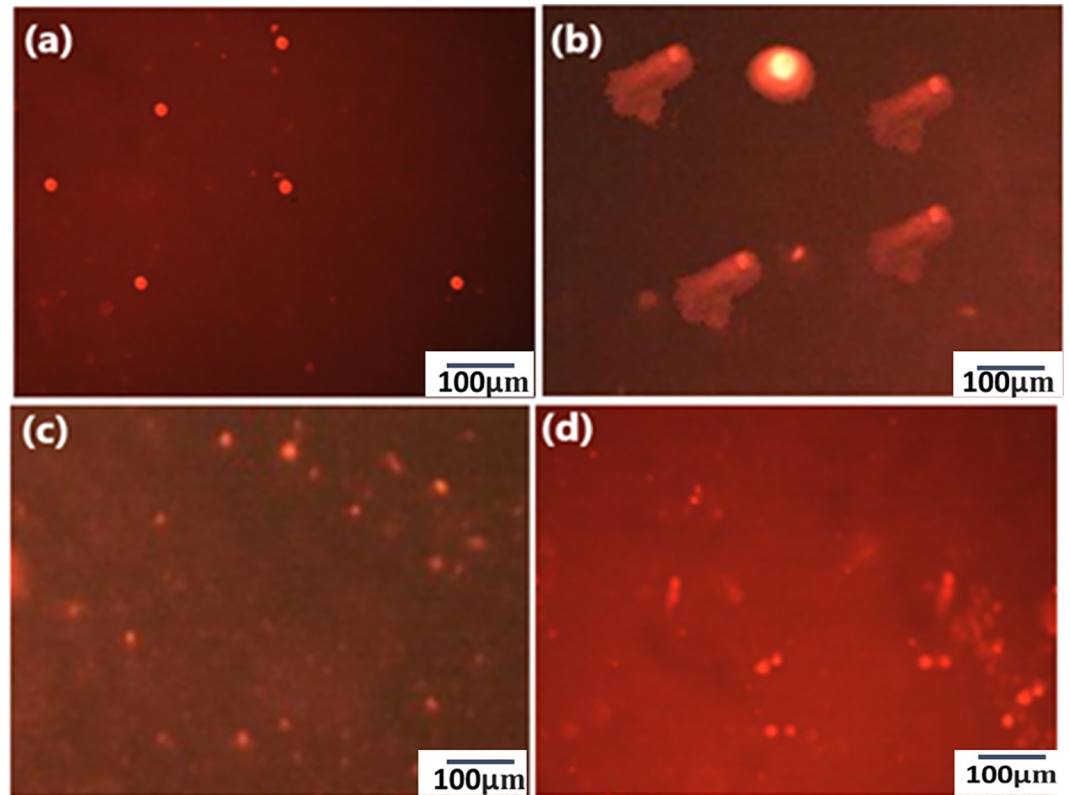

**Fig 5.** Fluorescence microscopy of the comet nucleus in treated HepG2 cells with an  $IC_{50}$  dose (27.3  $\mu$ g/ml) of GTME (b) in comparison to an intact nucleus in untreated HepG2 control cells (a) and in treated WI-38 cells with GTME (d) in comparison to untreated WI-38 control cells (c). All images are at 40X magnification.

<https://doi.org/10.1371/journal.pone.0309795.g005>

tumor suppressor (pRb) protein to allow cells to move from the G1 phase to the S phase. On the other hand, the kinase inhibitor proteins p21, p27, and p57 bind to the cyclin D/CDKs (4 or 6) complex or the cyclin E/CDK2 complex and prevent the G1/S transition [120]. Therefore, in the current investigation, QRT-PCR and ELISA were used to ascertain the expression levels of P21, P27, CDK2, CDK4, Cyclin D1, and Cyclin E in the extract-treated cells. The data that was obtained demonstrated that the extract enhanced P21 and P27 expression while

**Table 3.** The comet parameters in HepG2 cells treated with GTME and control untreated HepG2 cells, as well as in WI-38 cells treated with GTME and control untreated WI-38 cells, were determined using the comet assay.

| The tested cells                                             | Tail length (px) | %DNA in tail                  | Tail moment                  | Olive tail moment            |
|--------------------------------------------------------------|------------------|-------------------------------|------------------------------|------------------------------|
| Control HepG2 cells                                          | 8.58 $\pm$ 1.35  | 5.06 $\pm$ 0.31               | 0.41 $\pm$ 0.01              | 0.54 $\pm$ 0.02              |
| <b>Treated HepG2 cells with the green tea extract (GTME)</b> | 9.56 $\pm$ 0.52  | 13.83 $\pm$ 0.52 <sup>a</sup> | 1.34 $\pm$ 0.04 <sup>a</sup> | 1.89 $\pm$ 0.04 <sup>a</sup> |
| Control WI-38 cells                                          | 10.42 $\pm$ 1.63 | 7.40 $\pm$ 2.21               | 0.74 $\pm$ 0.04              | 1.11 $\pm$ 0.03              |
| <b>Treated WI-38 cells with the green tea extract (GTME)</b> | 9.56 $\pm$ 2.62  | 7.65 $\pm$ 1.83               | 0.78 $\pm$ 0.02              | 1.13 $\pm$ 0.02              |

Data from three separate tests are presented as the mean  $\pm$  standard deviation. Statistically significant ( $p < 0.05$ ) differences are shown by lowercase letters. <sup>a</sup> ( $p < 0.05$ ) with respect to control HepG2 cells.

<https://doi.org/10.1371/journal.pone.0309795.t003>

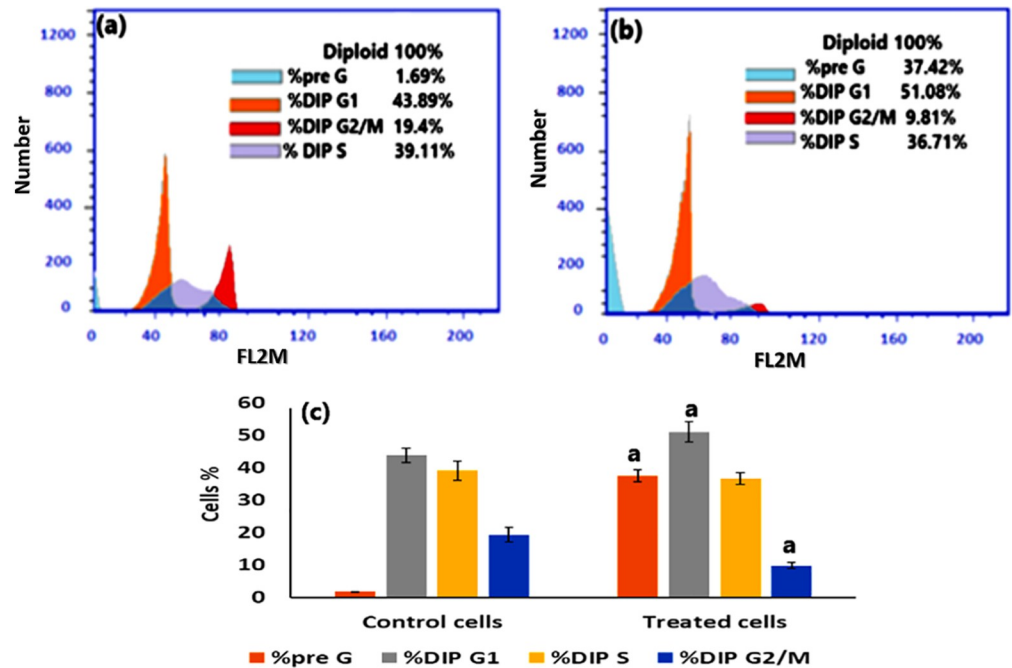

**Fig 6.** Flow cytometric examination of the distribution of the cell cycle at various stages in control HepG2 cells (a) and in HepG2 cells that had been treated with an  $IC_{50}$  dose (27.3  $\mu\text{g/ml}$ ) of green tea extract (GTME) (b). An illustration of a histogram that displays the proportions of cells in each stage of the cell cycle in untreated and GTME-treated cells (c). Statistically significant ( $p < 0.05$ ) differences are shown by lowercase letters. <sup>a</sup> ( $p < 0.05$ ) with respect to control cells.

<https://doi.org/10.1371/journal.pone.0309795.g006>

decreasing CDK2, CDK4, Cyclin D1, and Cyclin E expression in treated HepG2 cells, proving their roles in halting the treated HepG2 cell at the S phase.

**Effect of GTME on ROS induction in HepG2 cells.** Due to their heightened metabolic activity, most cancerous cells have high quantities of ROS, and these ROS have specific functions in the development of cancer cells such as angiogenesis, cell cycle progression, cell survival, and cell proliferation [121]. Earlier research has shown that ROS downregulation causes apoptosis [122], suggesting that ROS inhibition could be an effective cancer treatment [123]. In the obtained finding, the GTME significantly reduced ROS levels in the treated cells when compared to control cells ( $p < 0.05$ ), as shown in Fig 7. This suggests that the triggering of apoptosis in cells treated with green tea extract may be connected to the extract's capacity to lower ROS levels. Similar findings were made by prior research, which showed that the methanol extract of stevia and *Smallanthus sonchifolius* leaves decreased ROS in SKVO3 and HepG2 cells [25,124], respectively, as compared to control cells. This finally resulted in apoptosis. However, previous research has shown that the anticancer drug curcumin dramatically raised the levels of ROS inside HepG2 cells, causing apoptosis [125].

**Quantification analysis using qRT-PCR and ELISA assays.** Proapoptotic controllers (BAX, BAK, and BAD) and antiapoptotic controllers (BCL-2 and BCL-XL) are all members of the BCL-2 protein family, which regulates apoptosis [126]. Furthermore, mitochondrial permeabilization brought on by BAX overexpression increases Cytochrome c release into the cytoplasm, which in turn activates *Caspase-3* [127]. In this way, caspase3 activation triggers DNA damage, apoptosis, and a decrease in BCL2 gene expression [128]. Additionally, the kinase inhibitor proteins P21, P27, and P57 bind to the cyclin D/CDKs (4 or 6) complex or the cyclin E/CDK2 complex and prevent the G1/S transition [120]. So, in the present



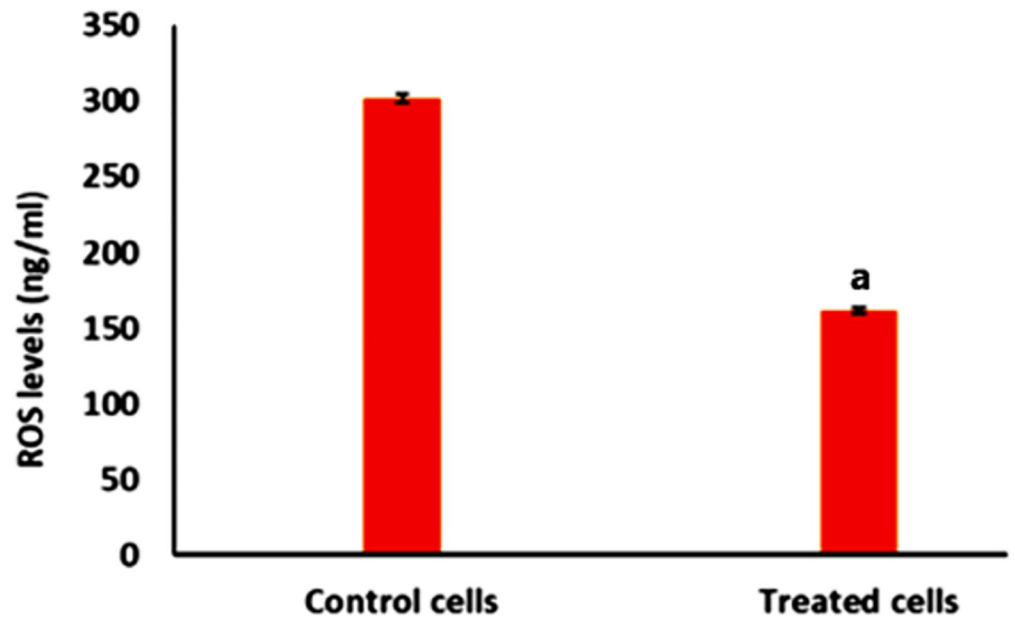

Fig 7. The quantity of reactive oxygen species (ROS) present in the HepG2 cells after treatment with an  $IC_{50}$  dose (27.3  $\mu\text{g/ml}$ ) of green tea extract (GTME) when compared to untreated cells. Statistically significant ( $p < 0.05$ ) differences are shown by lowercase letters. <sup>a</sup> ( $p < 0.05$ ) with respect to control cells.

<https://doi.org/10.1371/journal.pone.0309795.g007>

investigation, the effects of green tea extract on the levels of mRNA expression for genes associated with apoptosis (*BCL2*, *BAX*, and *Caspase-3*) and G1-phase cell cycle arrest (*P21*, *P27*, *CDK2*, *CDK4*, *Cyclin E*, and *Cyclin D1*) were assessed. Expressed levels of *BAX* and *Caspase-3* were found to be significantly increased, while *BCL-2* expression was found to be significantly decreased in the GTME-treated cells compared to the control cells,  $p < 0.05$  (Fig 8). These results suggest that the GTME-treated HepG2 cells' induction of apoptosis may have included the mitochondrial pathway. Prior studies have shown that the apposite anticancer

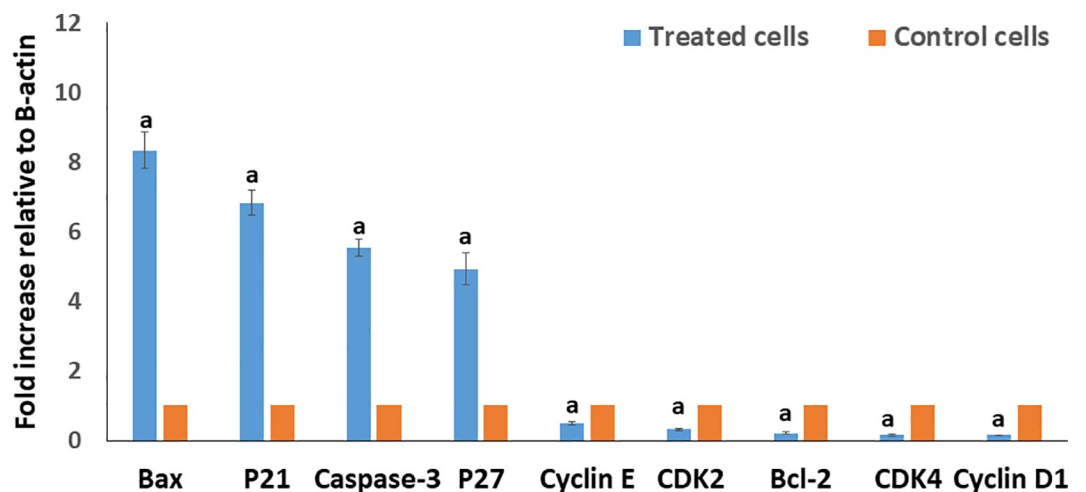

Fig 8. The effects of the green tea extract (GTME) at the  $IC_{50}$  dose (27.3  $\mu\text{g/ml}$ ) on the expression levels of *Bax*, *P21*, *Caspase-3*, *P27*, *Cyclin E*, *CDK2*, *Bcl-2*, *CDK4*, and *Cyclin D1* in HepG2-treated cells were compared to control cells using qRT-PCR. Statistically significant ( $p < 0.05$ ) differences are shown by lowercase letters. <sup>a</sup> ( $p < 0.05$ ) with respect to control cells.

<https://doi.org/10.1371/journal.pone.0309795.g008>

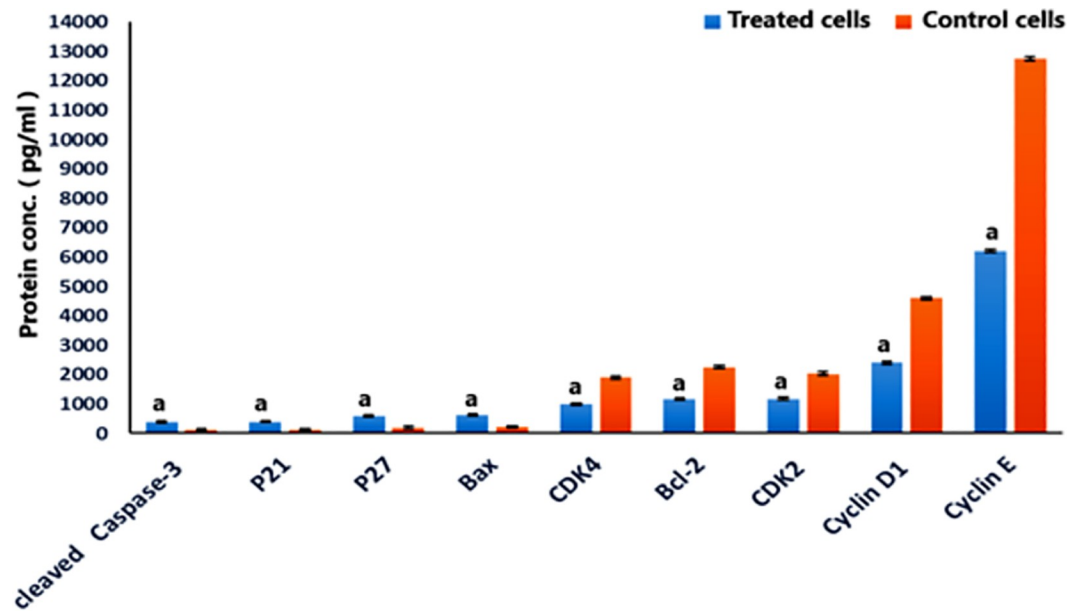

**Fig 9.** The effect of the  $IC_{50}$  dose ( $27.3\mu\text{g/ml}$ ) of green tea extract (GTME) on the protein content of Cyclin E, Cyclin D1, Bcl-2, CDK2, CDK4, Bax, cleaved Caspase-3, P27, and P21 in HepG2-treated cells compared to that of control cells using the ELISA method. Statistically significant ( $p < 0.05$ ) differences are shown by lowercase letters. <sup>a</sup> ( $p < 0.05$ ) with respect to control cells.

<https://doi.org/10.1371/journal.pone.0309795.g009>

medication curcumin exhibited a similar impact on the proteins implicated in programmed cell death in HepG2 cells. The apoptotic proteins caspase-3 and Bax were upregulated in HepG2 cells treated with curcumin, whereas the anti-apoptotic protein Bcl-2 was downregulated, causing induction of the mitochondrial apoptosis pathway [129]. In addition, the obtained green tea extract markedly elevated the expression levels of P21 and P27 genes while significantly lowering the expression of CDK2, CDK4, Cyclin E, and Cyclin D1,  $p < 0.05$  (Fig 8), indicating that the GTME produced G1 arrest in the treated HepG2 cells by controlling proteins associated with the G1/S phase.

In an effort to verify the levels of mRNA expression of all evaluated genes, the proteins that these genes express were tested in the GTME-treated cells using the ELISA test. The findings are displayed in Fig 9, which confirms that the treated cells exhibit significant elevated levels of the proteins Bax, P27, P21, and cleaved Caspase-3, while exhibit significant downregulated levels of CDK2, CDK4, Cyclin E, Cyclin D1, and Bcl-2 as compared to untreated cells. According to these results, which were in line with those of the aforementioned qRT-PCR, the tested green tea extract significantly raised the changes in apoptosis and G1-phase cell cycle arresting proteins within HepG2- treated cells as compared to the control cells.

## Conclusion

In the present investigation, a connection was established among the bioactive phytochemical components (antioxidant and anticancer ingredients) present in the generated hydromethanolic extract of green tea leaves (GTME) and the extract's powerful outcomes on the viability of the tested HepG2 cancer cells. With a substantial  $IC_{50}$  value of  $27.3\mu\text{g/ml}$  of the tested GTME, it had an improved effect on HepG2 cells in terms of inducing apoptosis, preventing the cell cycle at the G1 phase with a higher proportion of apoptotic cells in sub-G1, and lowering ROS levels in comparison to control cells. Furthermore, the extract affected proteins involved in

apoptosis and G1 cell cycle arrest in HepG2- treated cells as compared to control cells. Green tea leaf extract (GTME) shows promise as a natural therapy for human liver cancer, as suggested by these results. *In vivo* studies using animal models are crucial for providing evidence for these findings.

## Author Contributions

**Conceptualization:** Demiana H. Hanna, Ahlam K. Al-Atmani, Aljazi Abdullah AlRashidi, E. El. Shafee.

**Data curation:** Demiana H. Hanna, Ahlam K. Al-Atmani, Aljazi Abdullah AlRashidi, E. El. Shafee.

**Formal analysis:** Demiana H. Hanna, Ahlam K. Al-Atmani, Aljazi Abdullah AlRashidi, E. El. Shafee.

**Investigation:** Demiana H. Hanna, Ahlam K. Al-Atmani, Aljazi Abdullah AlRashidi, E. El. Shafee.

**Methodology:** Demiana H. Hanna, Ahlam K. Al-Atmani, E. El. Shafee.

**Supervision:** Demiana H. Hanna, E. El. Shafee.

**Validation:** Demiana H. Hanna, Ahlam K. Al-Atmani, E. El. Shafee.

**Visualization:** Demiana H. Hanna, Ahlam K. Al-Atmani, E. El. Shafee.

**Writing – original draft:** Demiana H. Hanna, Ahlam K. Al-Atmani, Aljazi Abdullah AlRashidi, E. El. Shafee.

**Writing – review & editing:** Demiana H. Hanna, Ahlam K. Al-Atmani, Aljazi Abdullah AlRashidi, E. El. Shafee.

## References

1. Wang H, Naghavi M, Allen C, Barber R.M, Bhutta Z.A. et al. Global Burden of Disease Liver Cancer Collaboration 2015 Mortality and Causes of Death Collaborators. Global, regional, and national life expectancy, all-cause mortality, and cause-specific mortality for 249 causes of death, 1980–2015: a systematic analysis for the Global Burden of Disease Study 2015. *Lancet*. 2016; 388: 1459–1544.
2. Akinyemiju T, Abera S, Ahmed M, Alam N, Alemayohu M.A. et al. The burden of primary liver cancer and underlying etiologies from 1990 to 2015 at the global, regional, and national level: results from the global burden of disease study 2015. *JAMA Oncol*. 2017; 3: 1683–1691 <https://doi.org/10.1001/jamaoncol.2017.3055> PMID: 28983565
3. Bray F, Ferlay J, Soerjomataram I, Siegel R.L, Torre L.A, Jemal A. Global Cancer Statistics 2018: Globocan estimates of incidence and mortality worldwide for 36 cancers in 185 countries. *CA Cancer J Clin*. 2018; 68: 394–424. <https://doi.org/10.3322/caac.21492> PMID: 30207593
4. Tanaka H, Fujita N, Sugimoto R, Urawa N, Horiike S, Kobayashi Y, et al. Hepatic oxidative DNA damage is associated with increased risk for hepatocellular carcinoma in chronic hepatitis C. *Br J Cancer*. 2008; 98:580–586. <https://doi.org/10.1038/sj.bjc.6604204> PMID: 18231107
5. Park SH, Lee Y, Han SH, Kwon SY, Kwon OS, Kim SS, et al. Systemic chemotherapy with doxorubicin, cisplatin and capecitabine for metastatic hepatocellular carcinoma. *BMC Cancer*. 2006; 5:1–6. [PMC free article] [PubMed] [Google Scholar] <https://doi.org/10.1186/1471-2407-6-3> PMID: 16396674
6. Chen YB, Yan ML, Gong JP, Xia RP, Liu LX, Lu SC, et al. Establishment of hepatocellular carcinoma multidrug resistant monoclonal cell line HepG2/mdr1. *Chinese Med J (Engl)* 2007; 120:703–707. [PubMed] [Google Scholar] PMID: 17517188
7. Locher C, Conforti R, Aymeric L, Ma Y, Yamazaki T, Rusakiewicz S, et al. Desirable cell death during anticancer chemotherapy. *Ann N Y Acad Sci*. 2010; 1209:99–108. [PubMed] [Google Scholar] <https://doi.org/10.1111/j.1749-6632.2010.05763.x> PMID: 20958322
8. Yamada T.; Hayasaka S.; Shibata Y.; Ojima T.; Saegusa T.; Gotoh T.; Ishikawa S.; Nakamura Y.; Kayaba K. Frequency of citrus fruit intake is associated with the incidence of cardiovascular disease:

- The Jichi Medical School cohort study. *J. Epidemiol.* 2011, 21, 169–175. <https://doi.org/10.2188/jea.je20100084> PMID: 21389640
9. Mursu J.; Virtanen J.K.; Tuomainen T.P.; Nurmi T.; Voutilainen S. Intake of fruit, berries, and vegetables and risk of type 2 diabetes in Finnish men: The kuopio ischaemic heart disease risk factor study. *Am. J. Clin. Nutr.* 2014, 9, 328–333. <https://doi.org/10.3945/ajcn.113.069641> PMID: 24257723
  10. Hartwell J.L. *Plants used against cancer*. Quarterman: Lawrence, MA; 1982.
  11. Aziz M.H., Kumae R., Ahmad N., Cancer chemoprevention by resveratrol: in vitro and in vivo studies and the underlying mechanisms (review), *Int. J. Oncol.* 23 (2003) 17–28. PMID: 12792772
  12. Cai Y., Luo Q., Sun M., Corke H., Antioxidant activity and phenolic compounds of 112 traditional Chinese medicinal plants associated with anticancer, *Life Sci.* 74 (2004) 2157–2184. <https://doi.org/10.1016/j.lfs.2003.09.047> PMID: 14969719
  13. Musial C, Kuban-Jankowska A, Gorska-Ponikowska M. Beneficial Properties of Green Tea Catechins. *Int J Mol Sci.* 2020, 21, 1744.
  14. Masek A.; Chrzescijanska E.; Latos M.; Zaborski M.; Podsedek A. Antioxidant and antiradical properties of green tea extract compounds. *Int. J. Electrochem. Sci.* 2017, 12, 6600–6610.
  15. Du GJ, Zhang Z, Wen XD, Yu C, Calway T, Yuan CS, Wang CZ. Epigallocatechin Gallate (EGCG) is the most effective cancer chemopreventive polyphenol in green tea. *Nutrients.* 2012, 4, 1679–91. <https://doi.org/10.3390/nu4111679> PMID: 23201840
  16. Mocanu M.M., Nagy P., Szölösi J., Vanden Eynde J.J., Mayence A. Chemoprevention of breast cancer by dietary polyphenols. *Molecules.* 2015; 20:22578–22620. <https://doi.org/10.3390/molecules201219864> PMID: 26694341
  17. Yang GY, Liao J, Li C, Chung J, Yurkow EJ, Ho CT, Yang CS. Effect of black and green tea polyphenols on c-jun phosphorylation and H2O2 production in transformed and non-transformed human bronchial cell lines: possible mechanisms of cell growth inhibition and apoptosis induction. *Carcinogenesis* 2000; 21(11):2035–9. <https://doi.org/10.1093/carcin/21.11.2035> PMID: 11062165
  18. Ahmad N, Cheng P, Mukhtar H. Cell cycle dysregulation by green tea polyphenol epigallocatechin-3-gallate. *Biochem Biophys Res Commun* 2000; 275:328–34. <https://doi.org/10.1006/bbrc.2000.3297> PMID: 10964666
  19. Geetha B. and Santhy K. S., Anti-proliferative activity of green tea extract in Human Cervical Cancer Cells (HeLa). ISSN: 2319-7706 Volume 2 Number 9 (2013) pp. 341–346.
  20. Márcia Carvalho; Carmen Jerónimo; Patrícia Valentão; Paula B. Andrade; Branca M. Silva (2010). Green tea: A promising anticancer agent for renal cell carcinoma. 122(1), 49–54.
  21. Ahmad N., Aldrin Z., Hasan A. et al., “Determination of total phenol, favonoid, antioxidant activity of oil palm leaves extracts and their application in transparent soap,” *Journal of Oil Palm Research*, vol. 30, no. 2, pp. 315–325, 2018.
  22. Chang C. C., Yang M. H., Wen H. M., and Chern J. C., “Estimation of total favonoid content in propolis by two complementary colometric methods,” *Journal of Food and Drug Analysis*, vol. 10, no. 3, pp. 178–182, 2020.
  23. Islam Tufikul & Hasan Raquib & Roy Aumit & Islam Md & Uddin Md & Islam Md & Neon Nuruzzaman & Sohel Md. (2015). SCREENING OF IN-VITRO ANTIOXIDANT, BRINE SHRIMP LETHALITY BIOASSAY AND ANTIMICROBIAL ACTIVITIES OF EXTRACTS OF BRIDELIA RETUSA (L.) SPRENG. FRUIT. *International Journal of Pharmacy.* 5. 1058–1067.
  24. Proestos C, Komaitis M. Analysis of Naturally Occurring Phenolic Compounds in Aromatic Plants by RP-HPLC Coupled to Diode Array Detector (DAD) and GC-MS after Silylation. *Foods.* 2013 Mar 13; 2(1):90–99. <https://doi.org/10.3390/foods2010090> PMID: 28239100
  25. Hanna DH, Osailan R, Ahmed HA. Stevia rebaudiana Methanolic Leaf Extract in Egypt: Phytochemical Analysis, Antioxidant, Antilipid Peroxidation, Antihemolytic, Antimetastatic, and Anticancer Properties. *Journal of Food Biochemistry* 2023, 2023; 1–22. <https://doi.org/10.1155/2023/7161091>.
  26. DH Hanna GR Saad. Nanocurcumin: preparation, characterization and cytotoxic effects towards human laryngeal cancer cells. *RSC Advances* 2020, 10 (35); 20724–20737. <https://doi.org/10.1039/D0RA03719B>.
  27. Ahmed T.A., Ahmed S.M., Elkhenany H. et al. The cross talk between type II diabetic microenvironment and the regenerative capacities of human adipose tissue-derived pericytes: a promising cell therapy. *Stem Cell Res Ther* 15, 36 (2024). <https://doi.org/10.1186/s13287-024-03643-1> PMID: 38331889
  28. Hanna DH, Hamed AA, Saad GR. Synthesis and characterization of poly (3-hydroxybutyrate)/chitosan-graft poly (acrylic acid) conjugate hyaluronate for targeted delivery of methotrexate drug to colon cancer cells. *International Journal of Biological Macromolecules* 2023, 240; 124396. <https://doi.org/10.1016/j.ijbiomac.2023.124396> PMID: 37037346

29. Hanna DH, Saad G R. Induction of mitochondria mediated apoptosis in human ovarian cancer cells by folic acid coated tin oxide nanoparticles. Plos one 2021, 16 (10); e0258115. <https://doi.org/10.1371/journal.pone.0258115> PMID: 34597348
30. El-Maadawy MW, Mohamed RR, Hanna DH. Preparation of carrageenan/ chitosan-based (N,N,N-trimethyl chitosan chloride) silver nanocomposites as pH sensitive carrier for effective controlled curcumin delivery in cancer cells. OpenNano 2023, 7, 100050. <https://doi.org/10.1016/j.onano.2022.100050>.
31. Hanna DH, Aziz MM, Shafee EE. Effective-by-method for the preparation of folic acid coated TiO<sub>2</sub> nanoparticles with high targeting potential for apoptosis induction against bladder cancer cells (T24). Biotechnology and Applied Biochemistry 2023;1–19. <https://doi.org/10.1002/bab.2456> PMID: 36905187
32. Ledy G.B., Catalina L.R., Azacena O.C. and Catalina R.M., 2012. Free radical scavenging and cytotoxic activity of five commercial standardized extracts (red wine, green tea, pine bark, polygonum and pomegranate). Afr. J. Biotechnol. 2006; 11 (102): 16725–30.
33. Luo H. (2006). Phase IIa chemoprevention trial of green tea polyphenols in high-risk individuals of liver cancer: modulation of urinary excretion of green tea polyphenols and 8-hydroxydeoxyguanosine. Carcinogenesis, 27(2), 262–268. <https://doi.org/10.1093/carcin/bgi147> PMID: 15930028
34. Halstead F. D., Rauf M., Moiemmen N. S. et al., “The antibacterial activity of acetic acid against biofilm-producing pathogens of relevance to burns patients,” PLoS One, vol. 10, no. 9, Article ID e0136190, 2015.
35. Mssillou I, Agour A, Hamamouch N, Lyoussi B, Derwich E. Chemical Composition and In Vitro Antioxidant and Antimicrobial Activities of *Marrubium vulgare* L. ScientificWorldJournal. 2021 Oct 31; 2021:7011493. <https://doi.org/10.1155/2021/7011493> PMID: 34754277
36. Al-Marzoqi Ali & Hameed Imad & Idan Salah. (2015). Analysis of bioactive chemical components of two medicinal plants (Coriandrum sativum and Melia azedarach) leaves using gas chromatography-mass spectrometry (GC-MS). AFRICAN JOURNAL OF BIOTECHNOLOGY. 14. 2812–2830. 10.5897/AJB2015.14956.
37. Merlani M., Barbakadze V., Amiranashvili L., Gogilashvili L., Petrou A., Geronikaki A., Ćirić A., Glamčičlija J. & Soković M. Caffeic and 3-(3,4-dihydroxyphenyl)glyceric acid derivatives as antimicrobial agent: biological evaluation and molecular docking studies., SAR and QSAR in Environmental Research. 33:4, 307–321. 2022. <https://doi.org/10.1080/1062936X.2022.2066173> PMID: 35532307
38. Igwe Okenwa U. Echeme Johnbull O. Isolation, Characterization and Antibacterial activity of 4-(4-phenyl-1, 4-dihydronaphthalen-1-yl) Pentenoic Acid from the Stem Bark of Brachystegia eurycoma Harms. International Journal of Drug Development & Research. Vol. 5. 2013.
39. Abd EL-Aziz Diab Samih Al-Dahmi, Zahra Mansour, Hendaw Basant. Adiantumpedatum as anticancer, anti-oxidant and antiinflammatory agent. Bulletin of Faculty of Science, Zagazig University. Volume- 2023, Issue-4, pp-158–164. <https://doi.org/10.21608/bfszu.2023.213984.1277>
40. den Hartog G. J., Boots A. W., Adam-Perrot A., Brouns F., Verkooijen I. W., Weseler A. R., Haenen G. R., and Bast A., Erythritol is a sweet antioxidant, *Nutrition*. (2010) 26, no. 4, 449–458, <https://doi.org/10.1016/j.nut.2009.05.004> PMID: 19632091
41. Landry Greg M., Dunning Cody L., Conrad Taylor, Hitt Mallory J., Kenneth E. McMartin. Diglycolic acid inhibits succinate dehydrogenase activity in human proximal tubule cells leading to mitochondrial dysfunction and cell death. Toxicology Letters 221 (2013) 176–184.
42. Dutta S, Bhandary S, Haldar S, Bandyopadhyay S. HPLC based Phytochemicals Analysis of Phyllanthus emblica (Indian Gooseberry/Amla): A mini Review. Journal of Experimental Biology and Agricultural Sciences, April—2024; Volume— 12(2-BIONEXT-2023) page 266–273.
43. Balasubramanian S., Ganesh D., Panchal P., Teimouri M., & Surya Narayana V. V. S. (2014) GC–MS analysis of phytocomponents in the methanolic extract of Emblica officinalis Gaertn (Indian Gooseberry). Journal of Chemical and Pharmaceutical Research, 6(6):843–845.
44. Arundathi M. and Ramesh B. Evaluation of antifungal activity of Hexanoic acid (Hx) against Fusarium oxysporum f. sp. Lycopersici. International Journal of Pharmacy and Biological Sciences-IJPBSTM (2021) 11 (3): 27–31.
45. Sen Alaattin, Atmaca Pelin, Terzioglu Gulsum and Arslan Sevki. Anticarcinogenic Effect and Carcinogenic Potential of the Dietary Phenolic Acid: o-Coumaric Acid. Natural Product Communications. 2013 Vol. 8 No. 9 1269–1274. PMID: 24273864
46. SETYAWAN AHMAD DWI. Review: Natural products from Genus Selaginella (Selaginellaceae). N U S A N T A R A B I O S C I E N C E. Vol. 3, No. 1, pp. 44–58. <https://doi.org/10.13057/nusbiosci/n030107>
47. den Hartog G. J., Boots A. W., Adam-Perrot A., Brouns F., Verkooijen I. W., Weseler A. R., Haenen G. R., and Bast A., Erythritol is a sweet antioxidant, *Nutrition*. (2010) 26, no. 4, 449–458,

48. INAMORI YOSHIHIKO, KUBO MAYURI, KATO YOSHIKI, MASAHIDE YASUDA, HIROSHI TSUJIBO BABA KIMIYE, MITSUGI KOZAWA, The Biological activity of 3,4-O-Isopropylidene-3',4',5'-tetrahydroxystilbene. *Chem. Pharm. Bul.* 33(7) 2904–2909 (1985). Vol 33.
49. Sylla Balla Lavoie Serge Legault Jean Gauthier Charles, Pichette André. Synthesis, cytotoxicity and anti-inflammatory activity of rhamnose-containing ursolic and betulinic acid saponins. *Royal Society of Chemistry.* 2019, 9, 39743–39757. <https://doi.org/10.1039/c9ra09389c> PMID: 35541393
50. Bayor Marcel T., Gbedema Stephen Y., Annan Kofi. The antimicrobial activity of *Croton membranaceus*, a species used in formulations for measles in Ghana. *Journal of Pharmacognosy and Phytotherapy* Vol. 1(4) pp. 047–051, October, 2009
51. Ahuja Vishal, Macho Markéta, Ewe Daniela, Singh Manoj, Saha Subhasish, Saurav Kumar. Biological and Pharmacological Potential of Xylitol: A Molecular Insight of Unique Metabolism. *Foods* 2020, 9, 1592; <https://doi.org/10.3390/foods9111592> PMID: 33147854
52. Ishihara Yasuhiro, Katayama Kohhei, Sakabe Manami, Kitamura Mana, Aizawa Mami, Takara Minami, Itoha Kouichi. Antioxidant Properties of rare suga D-allose: Effects on mitochondrial reactive oxygen species production in Neuro2A cells. *The Journal of Bioscience and Bioengineering* VOL. 112 No. 6, 638–642, 2011.
53. Xiaoyang Zhu, Yangyang Guo, Liu Zhigang, Jingyi Yang, Huiru Tang, Wang Yulan. Itaconic acid exerts anti-inflammatory and antibacterial effects via promoting pentose phosphate pathway to produce ROS. *Scientific Reports* | (2021) 11:18173 | <https://doi.org/10.1038/s41598-021-97352-x>.
54. Su Bao-Ning, Pawlus Alison D., Jung Hyun-Ah, Keller William J., McLaughlin Jerry L., and Kinghorn A. Douglas. Chemical Constituents of the Fruits of *Morinda citrifolia* (Noni) and Their Antioxidant Activity. *J. Nat. Prod.* 2005, 68, 592–595. <https://doi.org/10.1021/np0495985> PMID: 15844957
55. Singh M., Kaur M., and Silakari O., Flavones: an important scaffold for medicinal chemistry, *European Journal of Medicinal Chemistry.* (2014) 84, 206–239. <https://doi.org/10.1016/j.ejmech.2014.07.013> PMID: 25019478
56. Wang Wei, Cheng Xiang, Cui Xue, Xia Dongguo, Wang Ziqing, Lv Xianhai. Synthesis and biological activity of novel Pyrazolo[3,4-d]pyrimidin-4-one derivatives as potent antifungal agent *Society of Chemical Industry.* 2021; 77: 3529–3537.
57. Rezende Celso O. Jr, Oliveira Larissa A, Oliveira Bruno A, Almeida Camila G, Ferreira Bianca S, Mirielle Le Hyaric, Guilherme S. L. Carvalho, Maria Cristina S. Lourenco, Michel Batista, Fabricio K. Marchini, Vania L. Silva, Claudio G. Diniz, Mauro V. Almeida. Synthesis and Antibacterial Activity of Alkylated Diamines and Amphiphilic Amides of Quinic Acid Derivatives. *Chem Biol Drug Des* 2015; 86: 344–350. <https://doi.org/10.1111/cbdd.12498> PMID: 25528858
58. Kontogiorgis C. A. & Hadjipavlou-Litina D. J. Synthesis and biological evaluation of novel coumarin derivatives with a 7-azomethine linkage. *Bioorg. Med. Chem. Lett.* 14, 611–614 (2004). <https://doi.org/10.1016/j.bmcl.2003.11.060> PMID: 14741253
59. Pastoriza S.,a M. Mesías,b C. Cabrera†a and J. A. Rufián-Henares. Healthy properties of green and white teas: an update. *Food & Function* 8 (2017) 2650–2662. <https://doi.org/10.1039/c7fo00611j> PMID: 28640307
60. Kapoor R., Gundpatil D. B., Somani B. L., Saha T. K., Bandyopadhyay S., Misra P. Anticancer Effect of DL-Glyceraldehyde and 2-Deoxyglucose in Ehrlich Ascites Carcinoma Bearing Mice and Their Effect on Liver, Kidney and Haematological Parameters. *Ind J Clin Biochem* (Apr-June 2014) 29 (2):213–220.
61. Marcelle de L. Ferreira, Vasconcelos Thatyana R. A, de Carvalho Erika M, Lourenço Maria C. S., Wardell Solange M. S. V, Wardell James L, Vitor F Ferreira, de Souza Marcus V. N. Synthesis and antitubercular activity of novel Schiff bases derived from D-mannitol. *Carbohydrate Research* 344 (2009) 2042–2047. <https://doi.org/10.1016/j.carres.2009.08.006> PMID: 19709650
62. Liu H.; Zhou Y.; Tang L. Caffeine induces sustained apoptosis of human gastric cancer cells by activating the caspase-9/caspase-3 signalling pathway. *Mol. Med. Rep.* 2017, 16, 2445–2454.
63. Saraiva S.M.; Jacinto T.A.; Gonçalves A.C.; Gaspar D.; Silva L.R. Overview of Caffeine Effects on Human Health and Emerging Delivery Strategies. *Pharmaceuticals* 2023, 16, 1067. <https://doi.org/10.3390/ph16081067> PMID: 37630983
64. Gramza A., Korczak J., Amarowicz R., Tea polyphenols- their antioxidant properties and biological activity—a review. *Pol. J. Food Nutr. Sci.*, 2005, 14/55, 219–235.
65. Fogliani B., Raharivelomanana P., Bianchini J.-P., Madjebi S.B., Hnawia R., Bioactive ellagitannins from *Cunonia macrophylla*, an endemic Cunoniaceae from New Caledonia. *Phytochem.*, 2005, 66, 241–247. <https://doi.org/10.1016/j.phytochem.2004.11.016> PMID: 15652581
66. Shukla Y.N., Srivastava A., Kumar S., Kumar S., Phytotoxic and antimicrobial constituents of *Argyrea speciosa* and *Oenothera biennis*. *J. Ethnopharmacol.*, 1999, 67, 241–245. [https://doi.org/10.1016/s0378-8741\(99\)00017-3](https://doi.org/10.1016/s0378-8741(99)00017-3) PMID: 10619391

67. Kaur S., Michael H., Arora S., Härkönen P.L., Kumar S. The in vitro cytotoxic and apoptotic activity of Triphala—an Indian herbal drug. *J. Ethnopharm.*, 2005, 97, 15–20. <https://doi.org/10.1016/j.jep.2004.09.050> PMID: 15652269
68. Mohsin O. Mohammed AL-Shwany, Synthesis and Antibacterial activities of some Arabinofuranose-Schiff bases Derivatives. *Kirkuk University Journal. Scientific Studies (KUJSS) Volume 11, Issue 3, September 2016*, p.p(1–14) ISSN 1992–0849.
69. Ponnush Babu Shankar, Subramaniyam Sathiyamoorthy, Pasupathi Palanisamy, c d Boopathi subramaniyam, Rajaram Virumandy. Antioxidant and Antimicrobial properties of Glycine Max-A review. *Int J Cur Bio Med Sci.* 2011; 1(2): 49–62.
70. KHIATI ZOULIKHA, CHERCHAR ABDELHAK and OTHMAN ADIL A. Synthesis, Metal Ions Coordination, Antimicrobial Activity of Some L-Tartaric Acid Derivatives. *Chem Sci Trans.*, 2012, 1(1), 185–193.
71. Marta Librán-Pérez Patricia Pereiro, Figueras Antonio, Novoa Beatriz. Antiviral activity of palmitic acid via autophagic flux inhibition in zebrafish (*Danio rerio*). *Fish and Shellfish Immunology* 95 (2019) 595–605. <https://doi.org/10.1016/j.fsi.2019.10.055> PMID: 31676430
72. Tsai Y. H., Borini Etichetti C. M., Di Benedetto C. et al. “Synthesis of triazole derivatives of Levoglucosenone as promising anticancer agents: effective exploration of the chemical space through retro-aza-Michael//aza-Michael isomerizations,” *Journal of Organic Chemistry*, vol. 83, no. 7, pp. 3516–3528, 2018.
73. Siracusa L., Napoli E., and Ruberto G., Novel chemical and biological insights of inositol derivatives in mediterranean plants, *Molecules.* 2022; 27, 1525. <https://doi.org/10.3390/molecules27051525> PMID: 35268625
74. Chaveriat Ludovic, Isabelle Gosselin b, Cécile Machut c, Patrick Martin. Synthesis, surface tension properties and antibacterial activities of amphiphilic D-galactopyranose derivatives. *European Journal of Medicinal Chemistry* 62 (2013) 177e186.
75. Levent G., Anderson R. C., Petrujkic B. et al., “Evaluation of thymol-β-d-glucopyranoside as a potential prebiotic intervention to reduce carriage of zoonotic pathogens in weaned and feeder pigs,” *Microorganisms*, vol. 9, no. 4, p. 860, 2021.
76. HosseiniAbari Afrouzossadat, Rourani HamedAmini, MahdiGhasemi Seyed, Kim Hyun, Kim Yun-Gon. Investigation of antioxidant and anticancer activities of unsaturated oligo-galacturonic acids produced by pectinase of *Streptomyces hydrogenans* YAM1. *Scientific Reports.* (2021) 11:8491. <https://doi.org/10.1038/s41598-021-87804->
77. Haewpetch Patinya, Rudeekulthamrong Prakarn, Kaulpiboon Jarunee. Enzymatic Synthesis of Maltitol and Its Inhibitory Effect on the Growth of *Streptococcus mutans* DMST 18777. *Biomolecules* 2022, 12, 167. <https://doi.org/10.3390/biom12020167> PMID: 35204667
78. Odularu Ayodele T., Ajibade Peter A., and Mbese Johannes Z. Impact of Molybdenum Compounds as Anticancer Agents. *Bioinorganic Chemistry and Applications.* Volume 2019, Article ID 6416198, 9 pages. <https://doi.org/10.1155/2019/6416198> PMID: 31582964
79. Abod Daiekh A. A., Mehrass Amat Al-khaleq O, Al-Saeedy Mohammed A. S, Al-Shabiti Ebtisam A. A. Synthesis and Characterization of Some New Glycosides Derived from The Sugar D-ribose of Expected Biological Activity. *Journal of Purity, Utility Reaction and Environment* Vol. 5 No.1, February 2016, 31–42.
80. Hyun Jeongeun, Lee Youngjae, Wang Sihyung, Kim Jinnyun, Kim Jieun, Cha JaeHo, Seo Young-Su & Jung Youngmi. Kombucha tea prevents obese mice from developing hepatic steatosis and liver damage. *Food Science and Biotechnology*, 25 (3) (2016), pp. 861–866. <https://doi.org/10.1007/s10068-016-0142-3> PMID: 30263346
81. ZICH DAVID B., M.S. Glycerol for Improving Solubility and Evaluation of Antimicrobial Activity for Natural Products. (2016).
82. Randjelović P., Veljković S., Stojiljković N., Sokolović D., Ilić I., Laketić D., Randjelović D., and Randjelović N., The beneficial biological properties of salicylic acid, *Acta Facultatis Medicinae Naissensis.* (2015) 32, no. 4, 259–265.
83. Singh B. R., Antibacterial activity of glycerol, lactose, maltose, mannitol, raffinose and xylose, *Medicine.* (2014) 12, 07–19.
84. Pinc MM, Dalmagro M, da Cruz Alves Pereira E, Donadel G, Thomaz RT, da Silva C, Macruz PD, Jacomassi E, Gasparotto A, Hoscheid J, Lourenço ELB, Alberton O. Extraction Methods, Chemical Characterization, and In Vitro Biological Activities of *Plinia cauliflora* (Mart.) Kausel Peels. *Pharmaceuticals (Basel).* 2023 Aug 17; 16(8):1173. <https://doi.org/10.3390/ph16081173> PMID: 37631088
85. Sueyoshi Miyu, Fukunaga Masaki, Mei Mizue1, Atsushi Nakajima, Tanaka Gaku, Murase Takayo, Narita Yuki, Hirata Sumio, Kadowaki Daisuke. Effects of lactulose on renal function and gut microbiota

- in adenine-induced chronic kidney disease rats. *Clinical and Experimental Nephrology* (2019) 23:908–919. <https://doi.org/10.1007/s10157-019-01727-4> PMID: 30895529
86. Abod Daiekh A. A., AL-Saeedy AL-Bader S. M., Mohammed A. Synthesis of New D-xylose Derivatives and Study Their Antimicrobial Effect. *Journal of Purity, Utility Reaction and Environment* Vol. 3 No.3, June 2014, 50–61.
  87. Levent G., Anderson R. C., Petrujkic B. et al., “Evaluation of thymol- $\beta$ -D-glucopyranoside as a potential prebiotic intervention to reduce carriage of zoonotic pathogens in weaned and feeder pigs,” *Microorganisms*, vol. 9, no. 4, p. 860, 2021.
  88. Mohsin O. Mohammed AL-Shwany, Synthesis and Antibacterial activities of some Arabinofuranose-Schiff bases Derivatives. *Kirkuk University Journal. Scientific Studies (KUJSS)* Volume 11, Issue 3, September 2016, p.p(1–14) ISSN 1992–0849.
  89. Tareq Abu-Izneid Abdur Rauf, Bawazeer Saud, Wadood Abdul, Patel Seema. Anti-Dengue, Cytotoxicity, Antifungal, and In Silico Study of the Newly Synthesized 3-O-Phospho- $\alpha$ -D-Glucopyranuronic Acid Compound. *BioMed Research International* Volume 2018, Article ID 8648956, 5 pages <https://doi.org/10.1155/2018/8648956>.
  90. Juurlink B. H., Azouz H. J., Aldalati A. M., AlTinawi B. M., and Ganguly P., Hydroxybenzoic acid isomers and the cardiovascular system, *Nutrition Journal*. (2014) 13, no. 1, 63–10, 2-s2.0–84902702352. <https://doi.org/10.1186/1475-2891-13-63> PMID: 24943896
  91. Premanathan M., Radhakrishnan S., Kulangiappan K., Singaravelu G., Thirumalaivasu V., Sivakumar T., and Kathiresan K., Antioxidant & anticancer activities of isatin (1H-indole-2,3-dione), isolated from the flowers of *Couroupita guianensis* Aubl, *Indian Journal of Medical Research*. (2012) 136, no. 5, 822–826.
  92. Espíndola K. M. M., Ferreira R. G., Narvaez L. E. M., Silva Rosario A. C. R., da Silva A. H. M., Silva A. G. B., Vieira A. P. O., and Monteiro M. C., Chemical and pharmacological aspects of caffeic acid and its activity in hepatocarcinoma, *Frontiers in Oncology*. (2019) 9, 2-s2.0–85068963648 <https://doi.org/10.3389/fonc.2019.00541> PMID: 31293975
  93. Pettit G. R., Singh S. B., Niven M. L., and Schmidt J. M., “Cell growth inhibitory dihydrophenanthrene and phenanthrene constituents of the african tree *Combretum cafrum*,” *Canadian Journal of Chemistry*, vol. 66, no. 3, pp. 406–413, 1988.
  94. Rasyid Abdullah, Putra Masteria Y., Yasman. Antibacterial and antioxidant activity of sea cucumber extracts collected from Lampung waters, Indonesia. *Kuwait Journal of Science* 50 (2023) 615–621.
  95. Singh B. R., “Antibacterial activity of glycerol, lactose, maltose, mannitol, raffinose and xylose,” *Medicine*, vol. 12, pp. 07–19, 2014.
  96. An SJ, Namkung JU, Ha KW, Jun HK, Kim HY, Choi BK. Inhibitory effect of D-arabinose on oral bacteria biofilm formation on titanium discs. *Anaerobe*. 2022 Jun; 75:102533. <https://doi.org/10.1016/j.anaerobe.2022.102533> PMID: 35143955
  97. Thi H. T., Le B. A., Le H. N. T., Okitsu K., Imamura K., Takenaka N., Luu B. V., and Maeda Y., Screening of fatty acids, saccharides, and phytochemicals in *Jatropha curcas* seed kernel as their trimethylsilyl derivatives using gas chromatography/mass spectrometry, *Journal of Chromatography B*. (2018) 1102–1103, no. 1–15, 66–73 <https://doi.org/10.1016/j.jchromb.2018.10.009> PMID: 30380465
  98. Lee WJ, Lee SH. Protocatechuic acid protects hepatocytes against hydrogen peroxide-induced oxidative stress. *Curr Res Food Sci*. 2022 Jan 13; 5:222–227. <https://doi.org/10.1016/j.crf.2022.01.006> PMID: 35106486
  99. Akhtar N., Mirza B., and Mirza B., “Phytochemical analysis and comprehensive evaluation of antimicrobial and antioxidant properties of 61 medicinal plant species,” *Arabian Journal of Chemistry*, vol. 11, no. 8, pp. 1223–1235, 2018.
  100. Desai A. G., Qazi G. N., Ganju R. K. et al., “Medicinal plants and cancer chemoprevention,” *Current Drug Metabolism*, vol. 9, no. 7, pp. 581–591, 2008. <https://doi.org/10.2174/138920008785821657> PMID: 18781909
  101. Soobrattee M. A., Neergheen V. S., Luximon-Ramma A., Aruoma O. I., and Bahorun T., “Phenolics as potential antioxidant therapeutic agents: mechanism and actions,” *Mutation Research, Fundamental and Molecular Mechanisms of Mutagenesis*, vol. 579, no. 1–2, pp. 200–213, 2005. <https://doi.org/10.1016/j.mrfmmm.2005.03.023> PMID: 16126236
  102. Farahmandfar R., Esmaeilzadeh Kenari R., Asnaashari M., Shahrapour D., and Bakhshandeh T., “Bioactive compounds, antioxidant and antimicrobial activities of *Arum maculatum* leaves extracts as affected by various solvents and extraction methods,” *Food Science and Nutrition*, vol. 7, no. 2, pp. 465–475, 2019.
  103. Geetha S., Sai-Ram M., Mongia S. S., Singh V., Ilavazhagan G., and Sawhney R. C., “Evaluation of antioxidant activity of leaf extract of sea buckthorn (*Hippophae rhamnoides* L.) on chromium (VI)



- induced oxidative stress in albino rats," *Journal of Ethnopharmacology*, vol. 87, no. 2–3, pp. 247–251, 2003. [https://doi.org/10.1016/s0378-8741\(03\)00154-5](https://doi.org/10.1016/s0378-8741(03)00154-5) PMID: 12860317
104. Shimoi K., Masuda S., Shen B., Furugori M., and Kinae N., "Radioprotective effects of antioxidative plant flavonoids in mice," *Mutation Research, Fundamental and Molecular Mechanisms of Mutagenesis*, vol. 350, no. 1, pp. 153–161, 1996.
  105. Kopjar M., Tadić M. & Piližota V. Phenol content and antioxidant activity of green, yellow and black tea leaves. *Chem. Biol. Technol. Agric.* 2, 1 (2015). <https://doi.org/10.1186/s40538-014-0028-7>.
  106. Hao C.; Zhu P.X.; Yang X.; Han Z.P.; Jiang J.H.; Zong C.; Zhang X.G.; Liu W.T.; Zhao Q.D.; Fan T.T. Overexpression of SIRT1 promotes metastasis through epithelial-mesenchymal transition in hepatocellular carcinoma. *BMC Canc.*, 2014, 14, 1–10. <https://doi.org/10.1186/1471-2407-14-978> PMID: 25522783
  107. Abdelakder Hassani & Mahmood Syed & Enezei Hamid & Siti Aslina Hussain, Datin Ir & Hamad Hamad & Aldoghachi Ahmed & Hagar, Abdullah & Doolaanea, Abd ALMONEM & Ibrahim, Wisam. (2020). Formulation, Characterization and Biological Activity Screening of Sodium Alginate-Gum Arabic Nanoparticles Loaded with Curcumin. *Molecules*. 25. 10.3390/molecules25092244.
  108. Abbas Haidy, El-Feky Yasmin A., Mohammad Al-Sawahli Majid, ELDeeb Nehal M, El-Nassan Hala Bakr & Zewail Mariam (2022) Development and optimization of curcumin analog nano-biosomes using 21.31 full factorial design for anti-tumor profiles improvement in human hepatocellular carcinoma: in-vitro evaluation, in-vivo safety assay, *Drug Delivery*, 29:1, 714–727, <https://doi.org/10.1080/10717544.2022.2044938> PMID: 35243951
  109. WAN-FENG LIANG YI-XI GONG, HAI-FENG L, SUN FU-LIANG, WEI-LONG L, CHEN DONG-QIN, XIE DAN-PING, REN CHEN-XI, XIAO-YU GUO, WANG ZI-YI, KWON TAEHO and SUN HU-NAN. Curcumin Activates ROS Signaling to Promote Pyroptosis in Hepatocellular Carcinoma HepG2 Cells. *in vivo* 35: 249–257 (2021). <https://doi.org/10.21873/invivo.12253> PMID: 33402471
  110. Shankar S, Ganapathy S, Hingorani SR, Srivastava RK. EGCG inhibits growth, invasion, angiogenesis and metastasis of pancreatic cancer. *Front Biosci.* 2008 1, 440–52. <https://doi.org/10.2741/2691> PMID: 17981559
  111. Shimizu M., Deguchi A., Lim J.T., Moriwaki H., Kopelovich L., Weinstein I.B. (–)-Epigallocatechin gallate and polyphenon E inhibit growth and activation of the epidermal growth factor receptor and human epidermal growth factor receptor-2 signaling pathways in human colon cancer cells. *Clin. Cancer Res.* 2005; 11:2735–2746. <https://doi.org/10.1158/1078-0432.CCR-04-2014> PMID: 15814656
  112. Atia MM, Abdel-Tawab HS, Mostafa AM, Mobarak SA. Nanocurcumin and curcumin prevent N, N'-methylenebisacrylamide-induced liver damage and promotion of hepatic cancer cell growth. *Sci Rep.* 2022 May 18; 12(1):8319. <https://doi.org/10.1038/s41598-022-12406-y> PMID: 35585174
  113. Jänicke RU, Sprengart ML, Wati MR, Porter AG. Caspase-3 is required for DNA fragmentation and morphological changes associated with apoptosis. *J Biol Chem.* 1998 Apr 17; 273(16):9357–60. <https://doi.org/10.1074/jbc.273.16.9357> PMID: 9545256
  114. Cao Jun, Jia Li, Zhou Hui-Min, Liu Yong, and Zhong Lai-Fu. Mitochondrial and Nuclear DNA Damage Induced by Curcumin in Human Hepatoma G2 Cells. *TOXICOLOGICAL SCIENCES* 91(2), 476–483 (2006). <https://doi.org/10.1093/toxsci/kj153> PMID: 16537656
  115. Sawsan Hassan Mahassni Roaa Mahdi Al-Reemi. Apoptosis and necrosis of human breast cancer cells by an aqueous extract of garden cress (*Lepidium sativum*) seeds. *Saudi Journal of Biological Sciences*, Volume 20, Issue 2, 2013, Pages 131–139. <https://doi.org/10.1016/j.sjbs.2012.12.002> PMID: 23961228
  116. Vermeulen K., Van Bockstaele D. R., and Berneman Z. N., "The cell cycle: a review of regulation, deregulation and therapeutic targets in cancer," *Cell Proliferation*, vol. 36, no. 3, pp. 131–149, 2003.
  117. Bai Chunhua, Zhao Jiaqi, Su Jieli, Chen Jiabin, Cui Xinmu, Sun Manqing, Zhang Xuewu, Curcumin induces mitochondrial apoptosis in human hepatoma cells through BCLAF1-mediated modulation of PI3K/AKT/GSK-3 $\beta$  signaling, *Life Sciences*, Volume 306, 2022, 120804, ISSN 0024-3205, <https://doi.org/10.1016/j.lfs.2022.120804>.
  118. Masuda M., Suzui M., Weinstein I.B. Effects of epigallocatechin-3-gallate on growth, epidermal growth factor receptor signaling pathways, gene expression, and chemosensitivity in human head and neck squamous cell carcinoma cell lines. *Clin. Cancer Res.* 2001; 7:4220–4229. PMID: 11751523
  119. Shimizu M., Deguchi A., Lim J.T., Moriwaki H., Kopelovich L., Weinstein I.B. (–)-Epigallocatechin gallate and polyphenon E inhibit growth and activation of the epidermal growth factor receptor and human epidermal growth factor receptor-2 signaling pathways in human colon cancer cells. *Clin. Cancer Res.* 2005; 11:2735–2746. <https://doi.org/10.1158/1078-0432.CCR-04-2014> PMID: 15814656
  120. Kumar Singh S., Banerjee S., Acosta E. P., Lillard J. W., Singh R. Resveratrol induces cell cycle arrest and apoptosis with docetaxel in prostate cancer cells via a p53/p21 and p27 pathway. *Oncotarget*. 2017; 8: 17216–17228. <https://doi.org/10.18632/oncotarget.15303>.

121. Al-Faze Rawan, Ahmed Hoda A., El-Atawy Mohamed A, Zaghloul Hayat, Alshammari Eida M, Jaremko Mariusz, Emwas Abdul-Hamid, Nabil Gehan M, Hanna Demiana H, Mitochondrial dysfunction route as a possible biomarker and therapy target for human cancer, *Biomedical Journal*; 2024,100714. <https://doi.org/10.1016/j.bj.2024.100714> PMID: 38452973
122. Kumari S., Badana A. K., Mohan M., Shailender G., and Malla R., "Reactive oxygen species: a key constituent in cancer survival," *Biomarker Insights*, vol. 13, Article ID 1177271918755391, 2018. <https://doi.org/10.1177/1177271918755391> PMID: 29449774
123. Jeong C. H. and Joo S. H., "Downregulation of reactive oxygen species in apoptosis," *Journal of Cancer Prevention*, vol. 21, no. 1, pp. 13–20, 2016. <https://doi.org/10.15430/JCP.2016.21.1.13> PMID: 27051644
124. Myint PP, Dao TTP, Kim YS. Anticancer Activity of Smallanthus sonchifolius Methanol Extract against Human Hepatocellular Carcinoma Cells. *Molecules*. 2019 24(17):3054. <https://doi.org/10.3390/molecules24173054> PMID: 31443460
125. LIANG WAN-FENG, GONG YI-XI, HAI-FENG L, SUN FU-LIANG1, WEI-LONG L, CHEN DONG-QIN, XIE DAN-PING, REN CHEN-XI, GUO XIAO-YU, WANG ZI-YI, KWON TAEHO and SUN HU-NAN. Curcumin Activates ROS Signaling to Promote Pyroptosis in Hepatocellular Carcinoma HepG2 Cells. *in vivo* 35: 249–257 (2021). <https://doi.org/10.21873/invivo.12253> PMID: 33402471
126. Adams JM, Cory S. Bcl-2-regulated apoptosis: mechanism and therapeutic potential. *Curr. Opin. Immunol.* 2007; (19):488–496. <https://doi.org/10.1016/j.coi.2007.05.004> PMID: 17629468.
127. Shawgo ME, Shelton SN, Robertson JD. Caspase-mediated Bak activation and cytochrome c release during intrinsic apoptotic cell death in Jurkat cells. *J Biol Chem.* 2008 Dec 19; 283(51):35532–8. <https://doi.org/10.1074/jbc.M807656200> PMID: 18927073
128. Liu X, He Y, Li F, Huang Q, Kato TA, Hall RP, Li CY. Caspase-3 promotes genetic instability and carcinogenesis. *Mol Cell.* 2015, 58, 284–96. <https://doi.org/10.1016/j.molcel.2015.03.003> PMID: 25866249
129. Wang Xiaoping, Tian Yu, Lin Huanping, Cao Xiaolan, Zhang Zhendong. Curcumin induces apoptosis in human hepatocellular carcinoma cells by decreasing the expression of STAT3/VEGF/HIF-1 $\alpha$  signaling. *Open Life Sciences* 2023; 18: 20220618.
